# Supplementary material for: Zirconium complexes stabilized by amine-bridged bis(phenolato) ligands as precatalysts for intermolecular hydroamination reactions
Source: Royal Society of Chemistry journal article supplement (doi:10.1039/c5dt02643a), 2015-01-01

## **Supporting Information**

### **Zirconium Complexes Stabilized by Amine-Bridged Bis(phenolato) Ligands as Precatalysts for Intermolecular Hydroamination Reactions**

Qiu Sun, Yaorong Wang, Dan Yuan,\* Yingming Yao\* and Qi Shen

Key Laboratory of Organic Synthesis of Jiangsu Province, College of Chemistry,  
Chemical Engineering and Materials Science, Dushu Lake Campus, Soochow  
University, Suzhou 215123, People's Republic of China

\* To whom correspondence should be addressed. Email: yaoym@suda.edu.cn

#### **Table of contents**

|                                                                                                                  |           |
|------------------------------------------------------------------------------------------------------------------|-----------|
| <b><sup>1</sup>H NMR spectra for kinetic study.....</b>                                                          | <b>S2</b> |
| <b><sup>1</sup>H NMR and <sup>13</sup>C NMR spectra of complexes 2, 3, 6, 7 and hydroamination products.....</b> | <b>S4</b> |

## $^1\text{H}$ NMR spectra monitoring for kinetic investigations of the reaction

$^1\text{H}$  NMR, 400 MHz,  $\text{C}_7\text{D}_8$ , ferrocene as internal standard

Substrate:  $[\mathbf{8e}]_0 = 0.3636 \text{ mol}\cdot\text{L}^{-1}$   $[\mathbf{9a}]_0 = 3.6363 \text{ mol}\cdot\text{L}^{-1}$ ; 10 mol % of complex **5**;  
110 °C

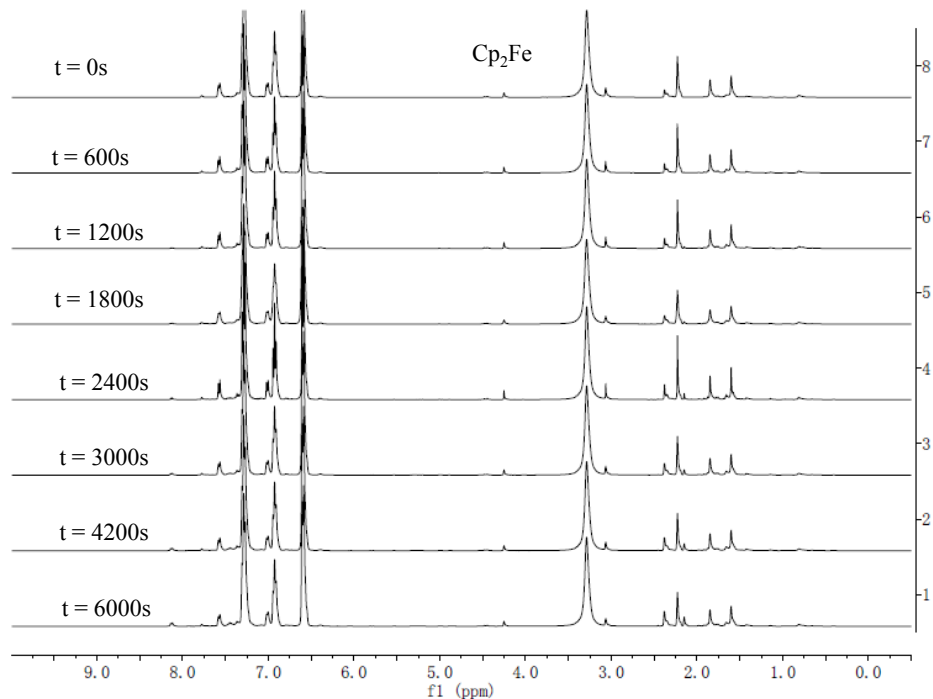

$^1\text{H}$  NMR, 400 MHz,  $\text{C}_7\text{D}_8$ , ferrocene as internal standard

Substrate:  $[\mathbf{8e}]_0 = 0.3636 \text{ mol}\cdot\text{L}^{-1}$   $[\mathbf{9a}]_0 = 0.7272 \text{ mol}\cdot\text{L}^{-1}$ ; 10 mol % of complex **5**;  
110 °C

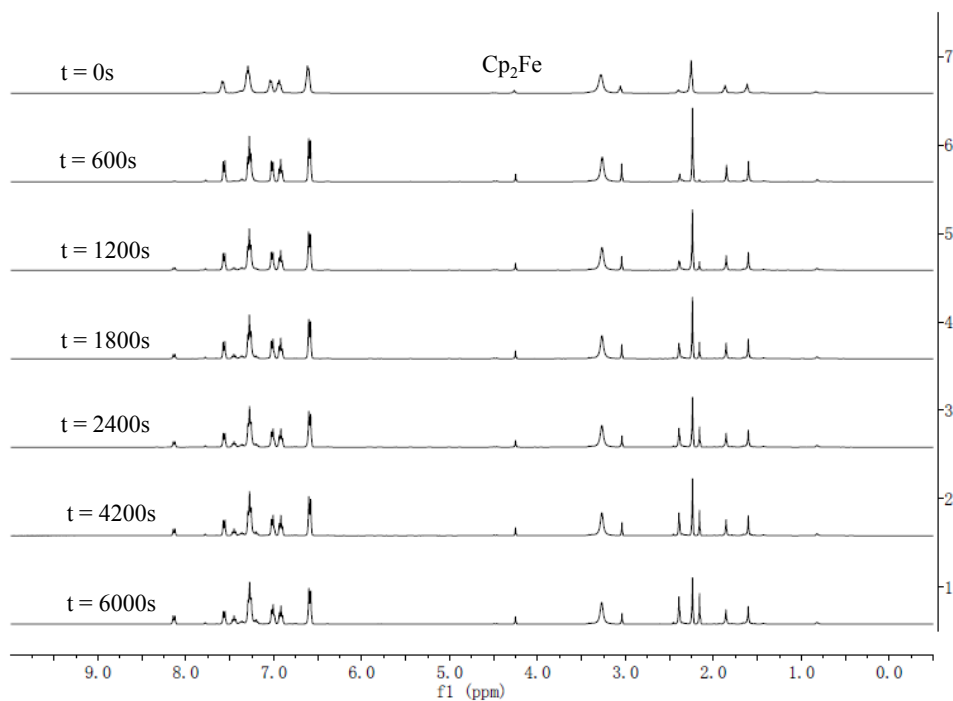

$^1\text{H}$  NMR, 400 MHz,  $\text{C}_7\text{D}_8$ , ferrocene as internal standard

Substrate:  $[\mathbf{8e}]_0 = 0.3636 \text{ mol}\cdot\text{L}^{-1}$   $[\mathbf{9a}]_0 = 1.8187 \text{ mol}\cdot\text{L}^{-1}$ ; 10 mol % of complex **5**;  
110 °C

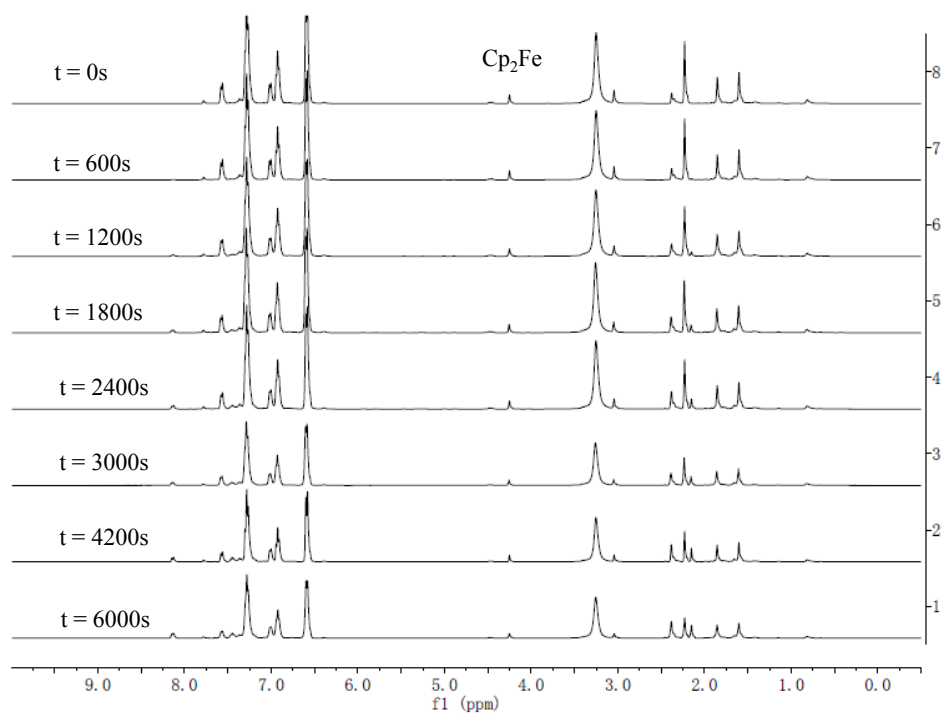

# $^1\text{H}$ NMR and $^{13}\text{C}$ NMR spectra for complexes and hydroamination products

## Complex 2

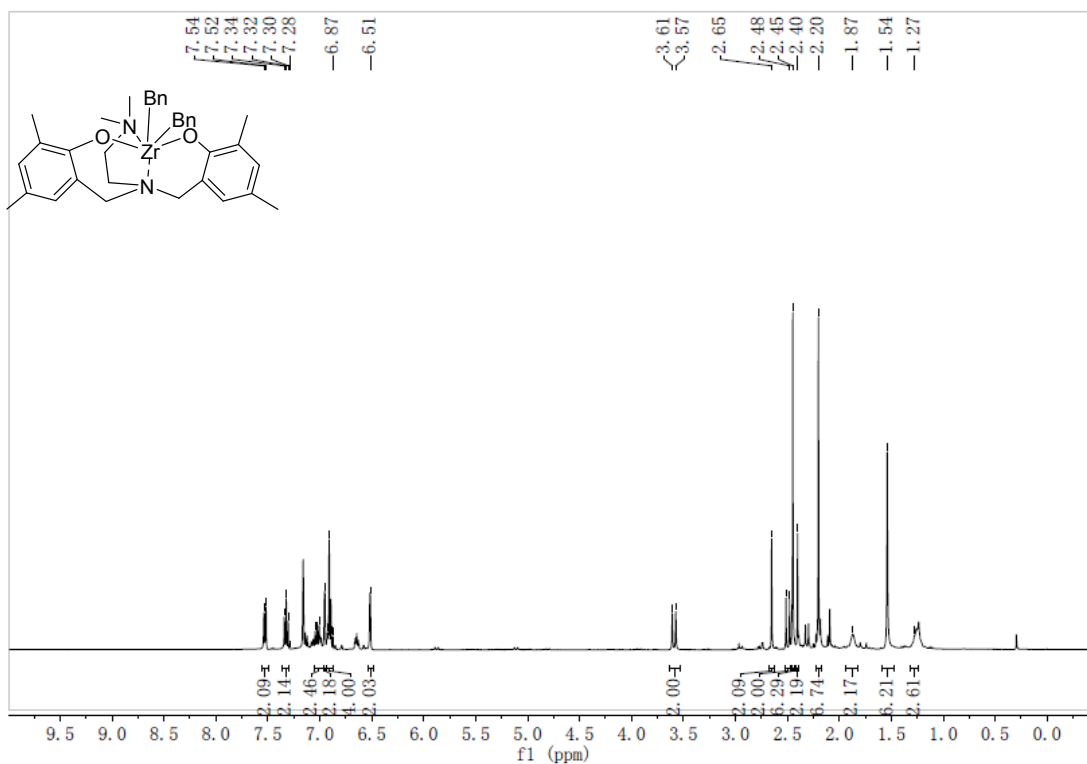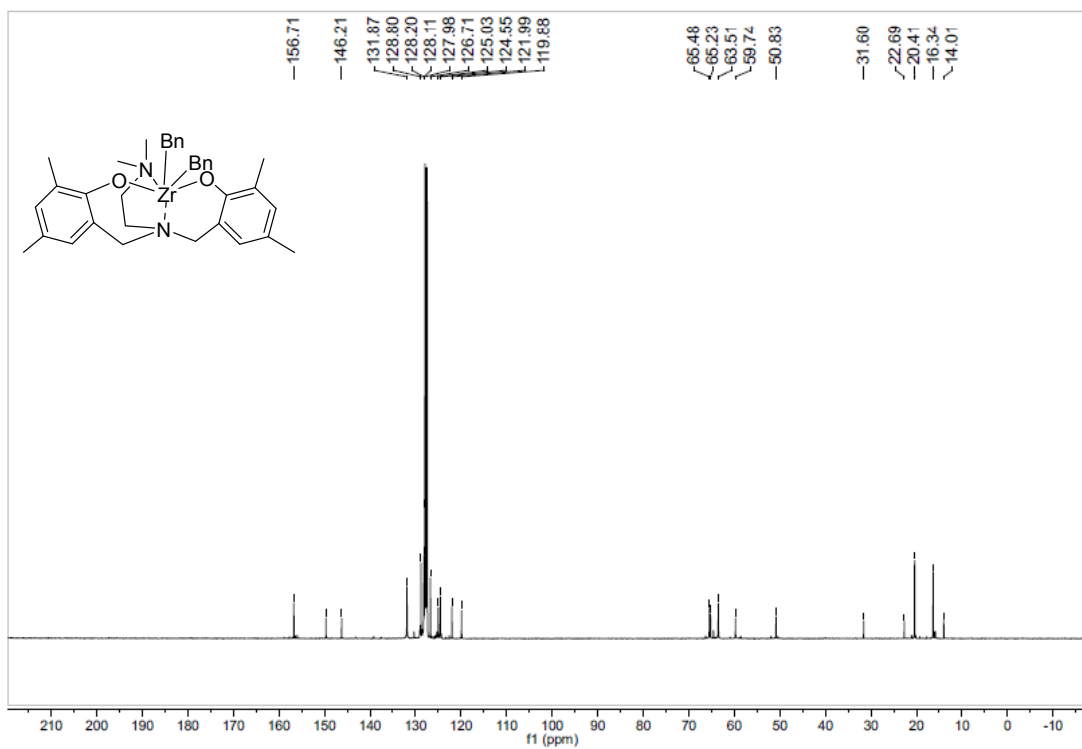

### Complex 3

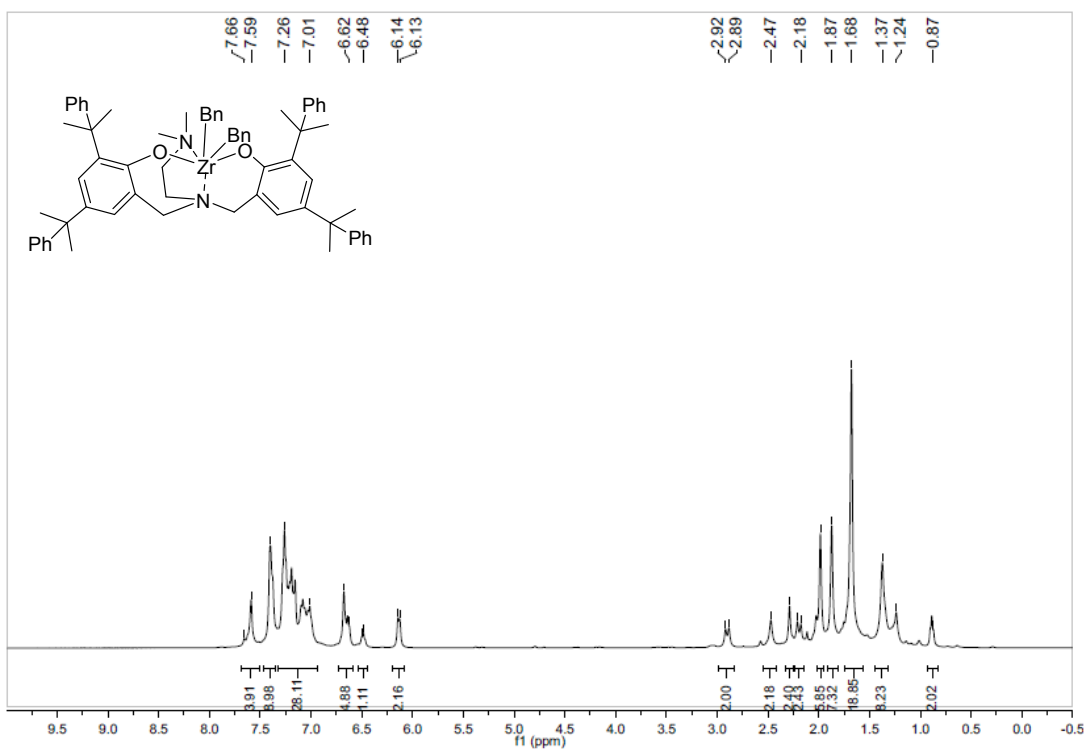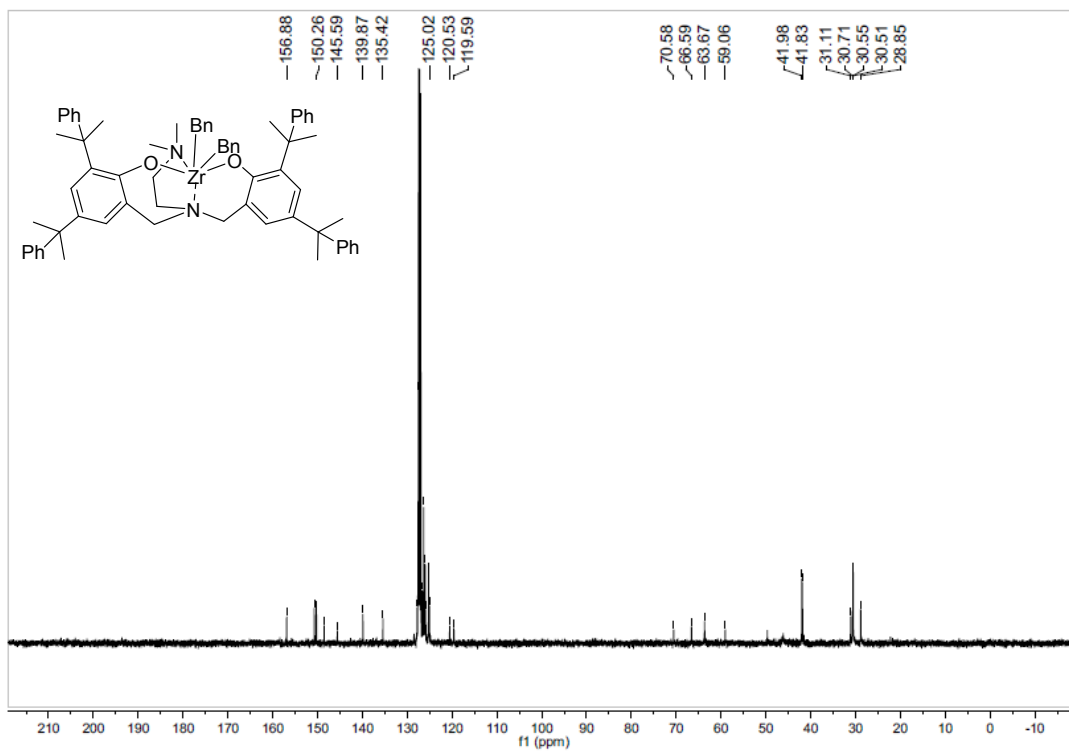

# Complex 6

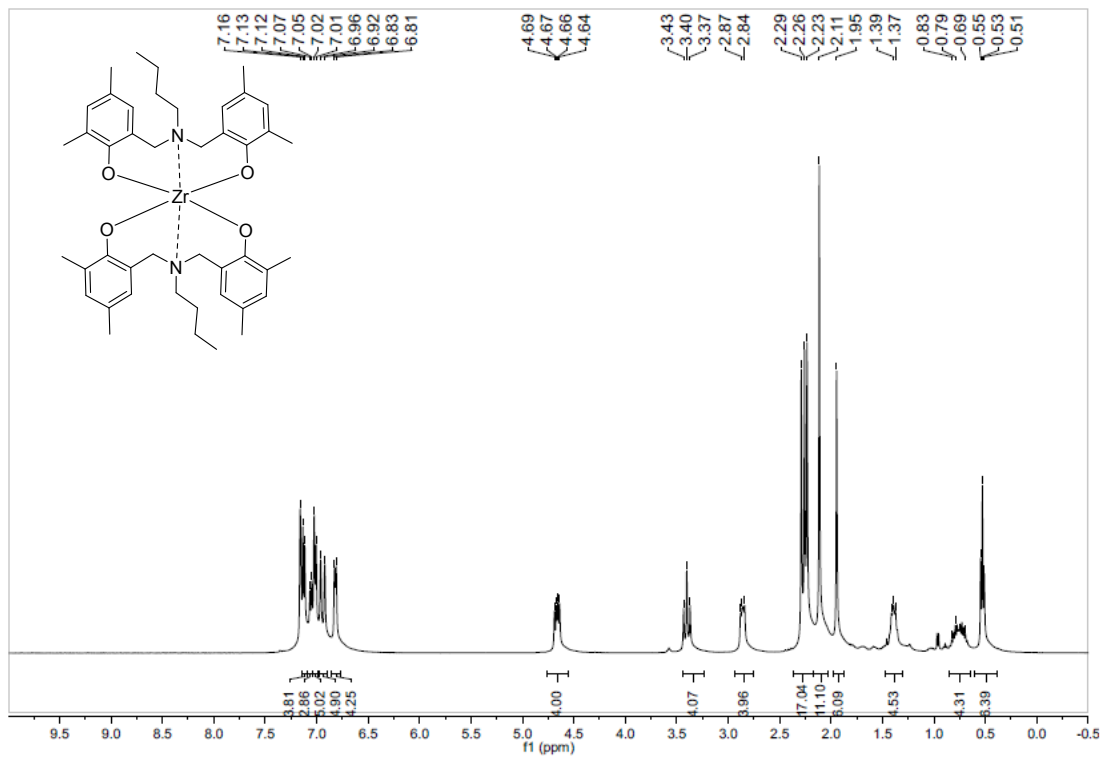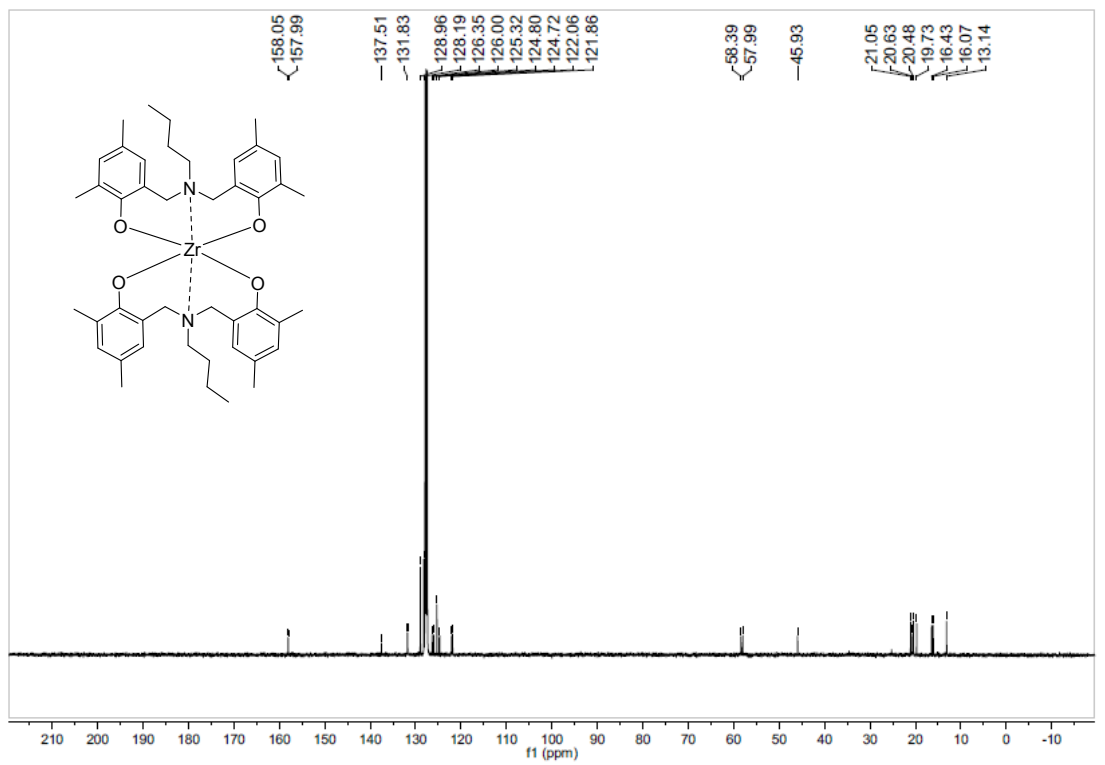

# Complex 7

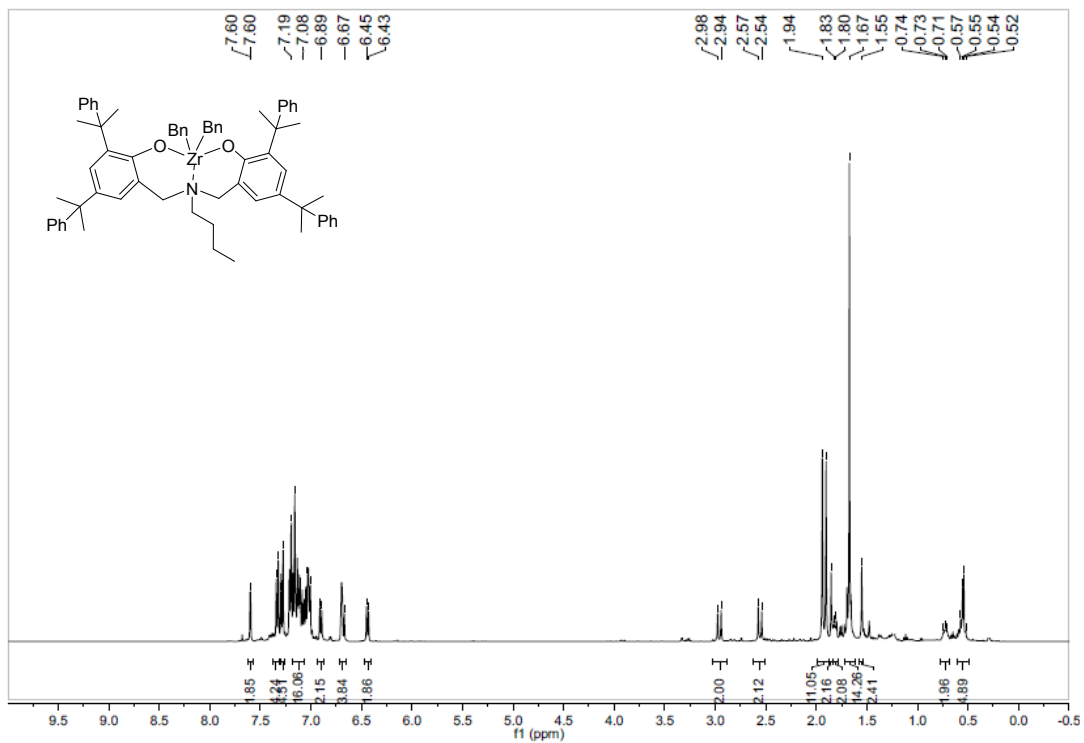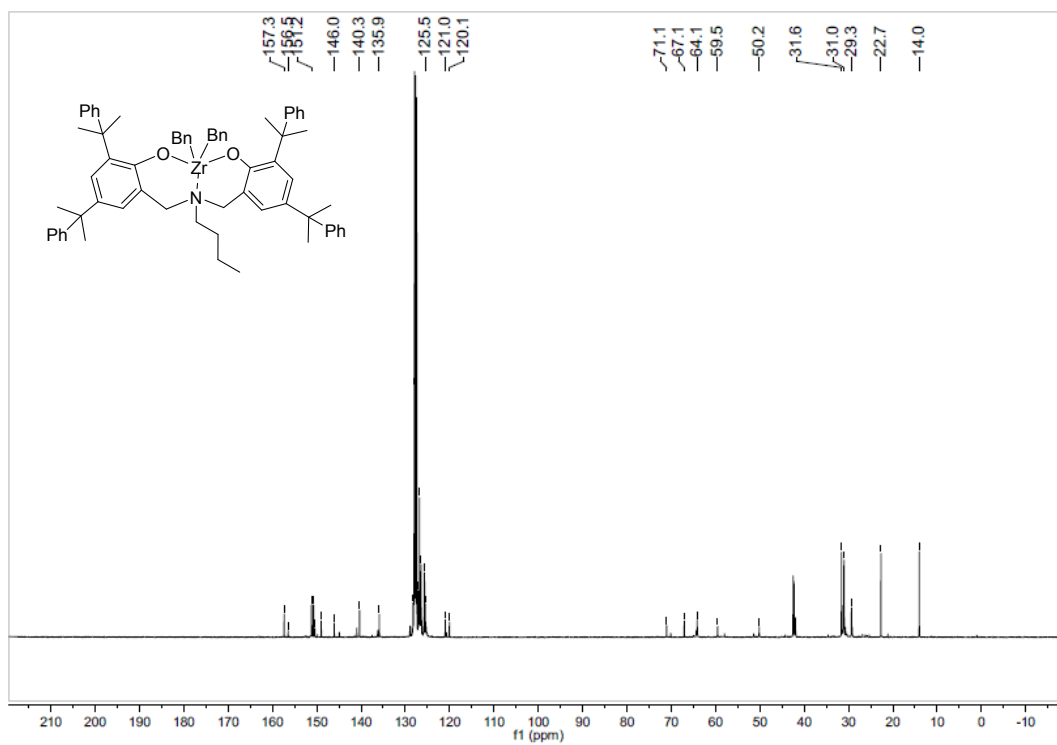

10a

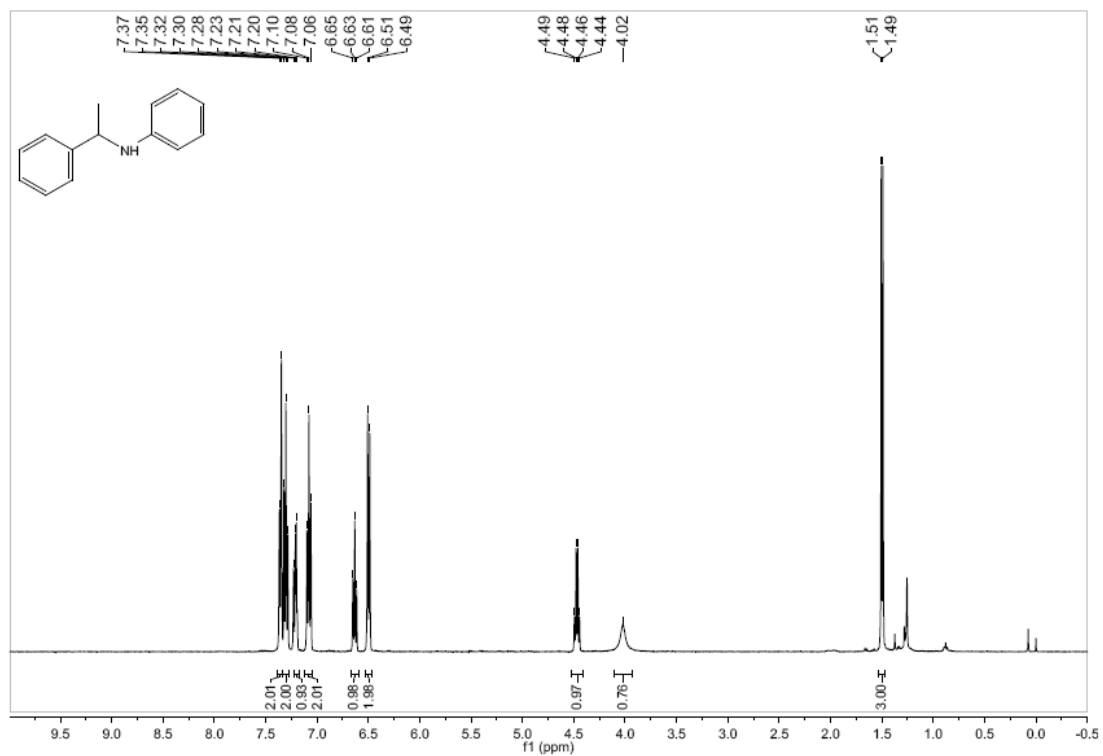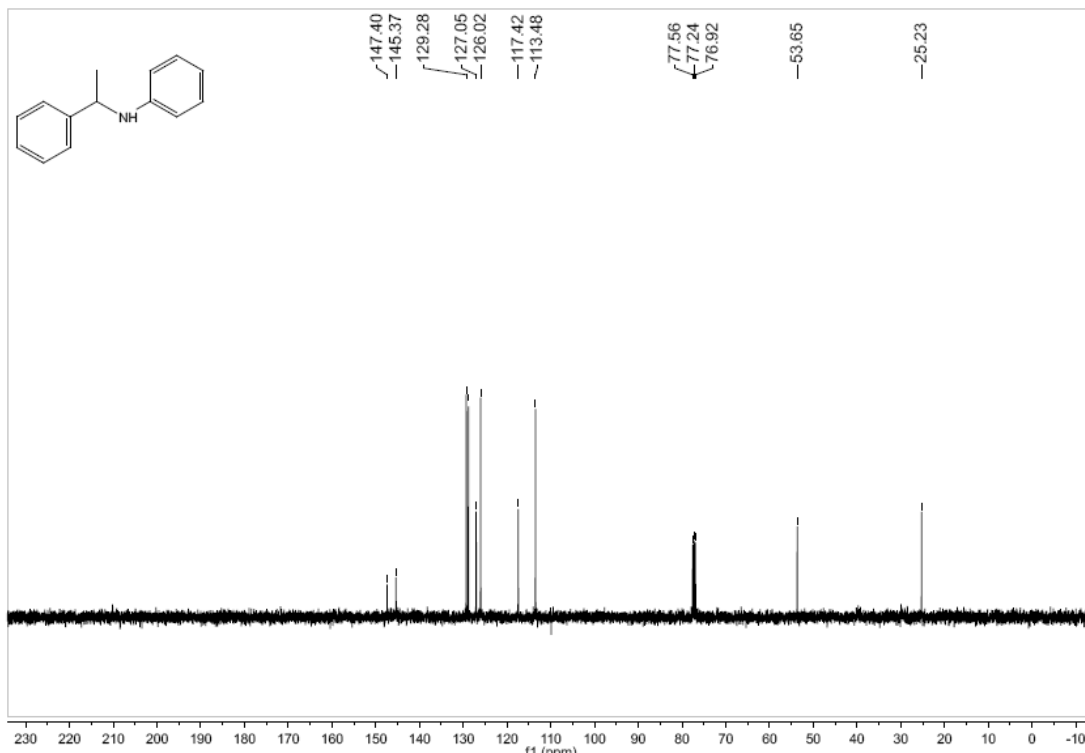



10b

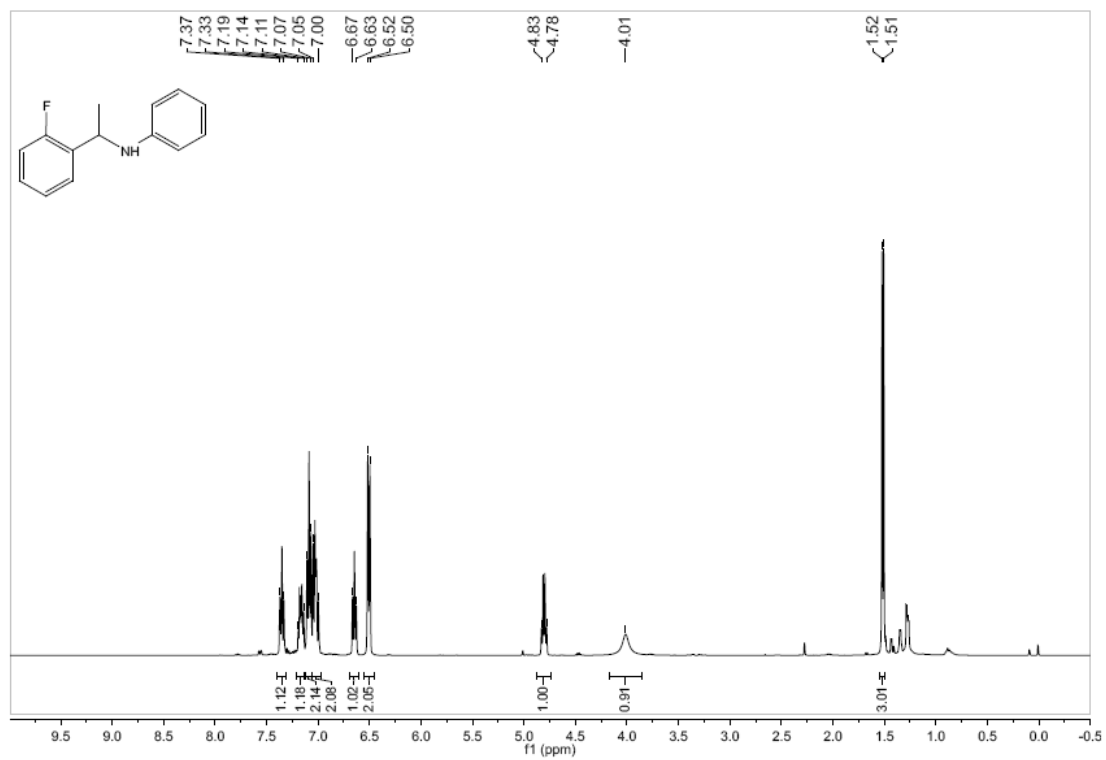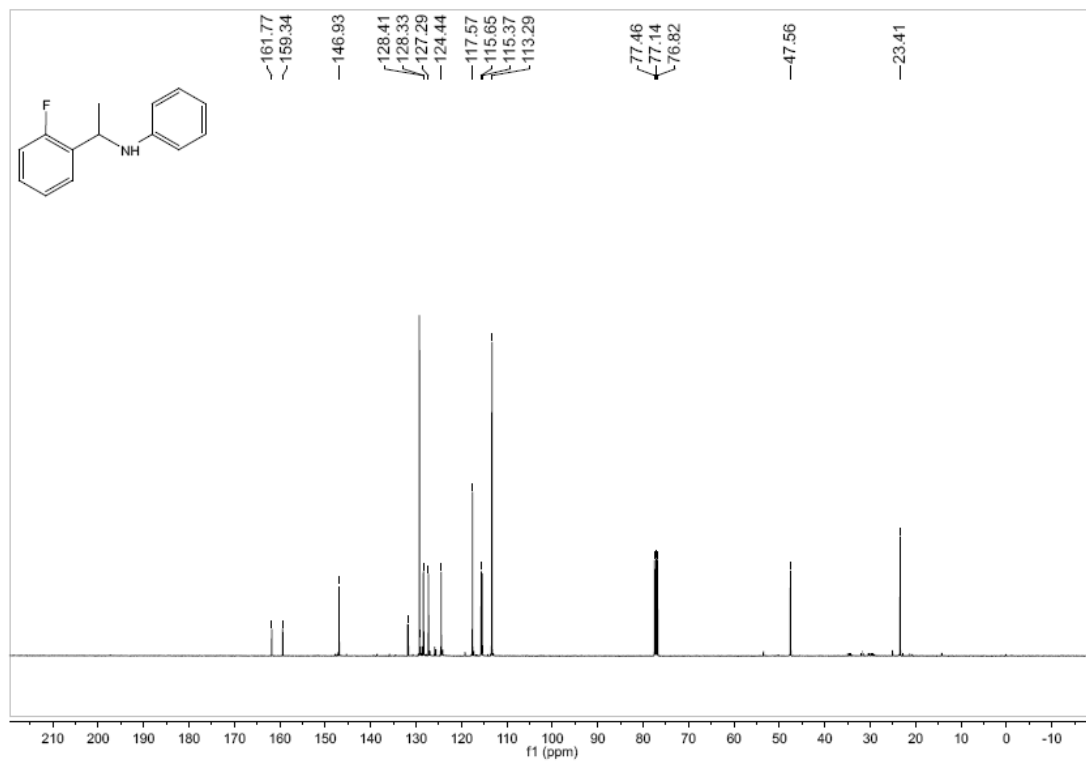

10c

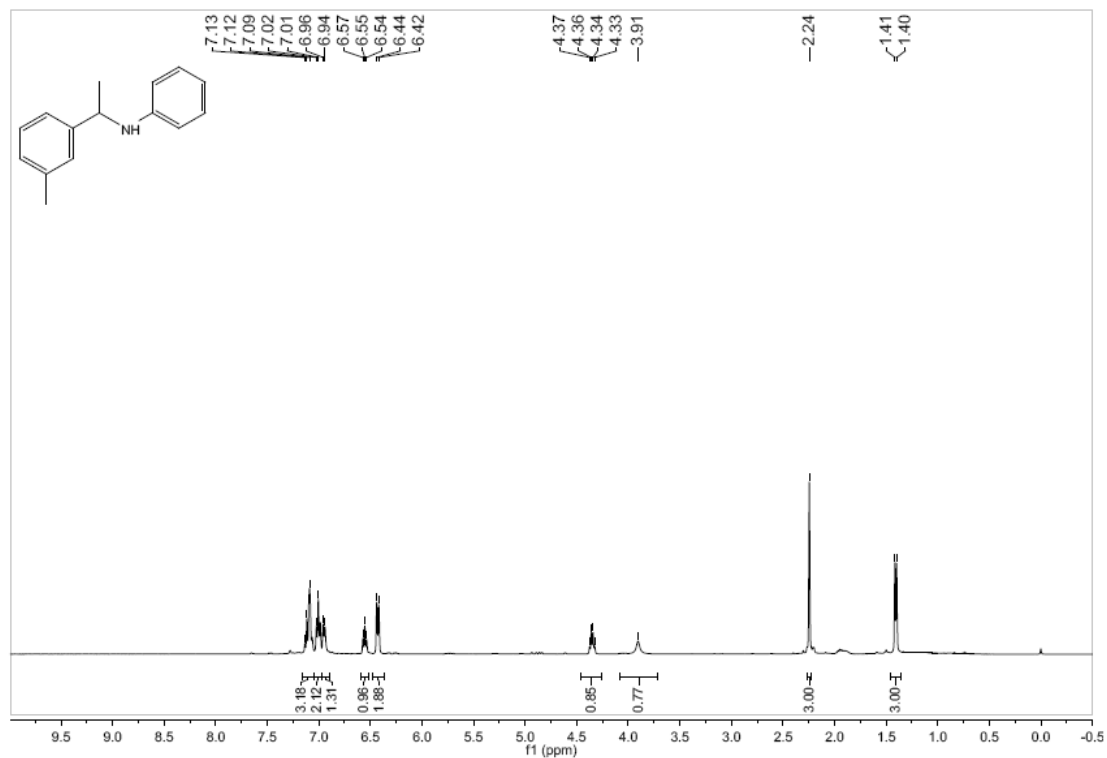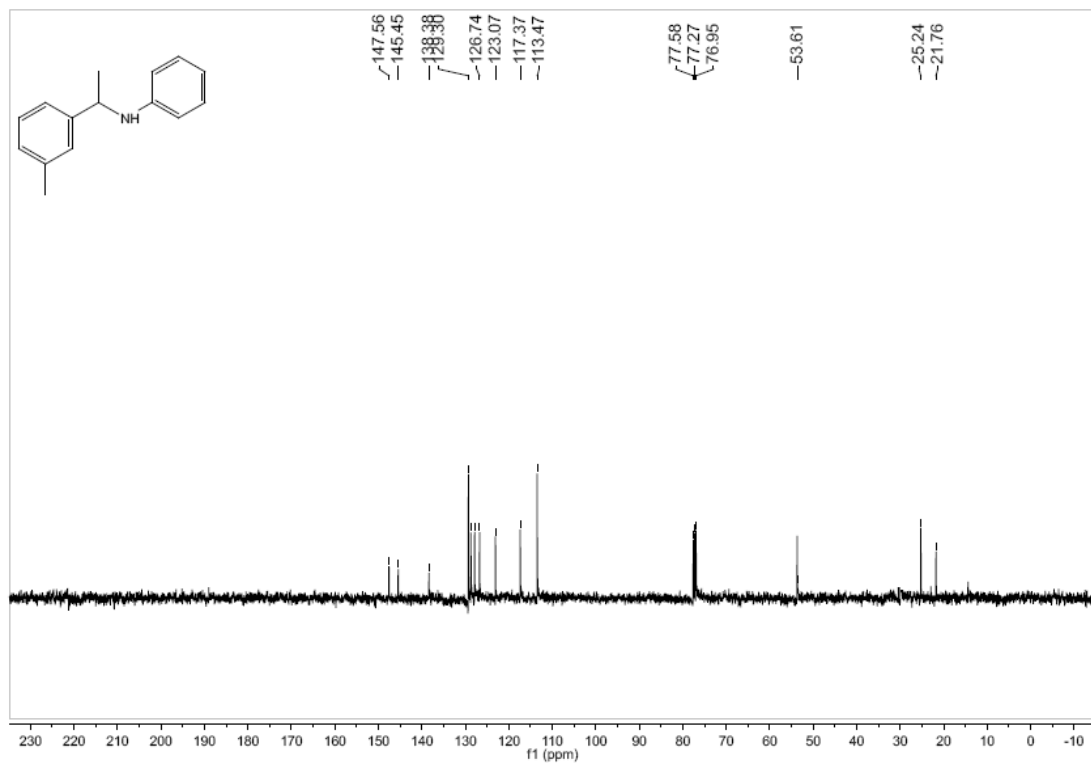

10d

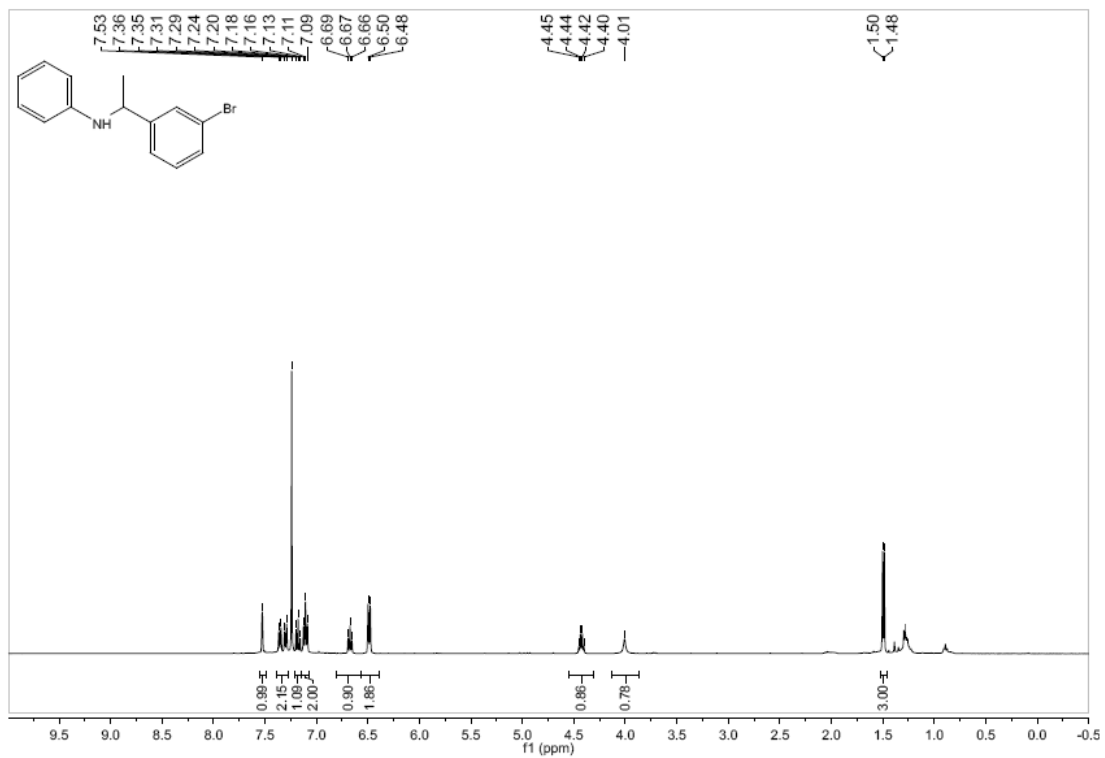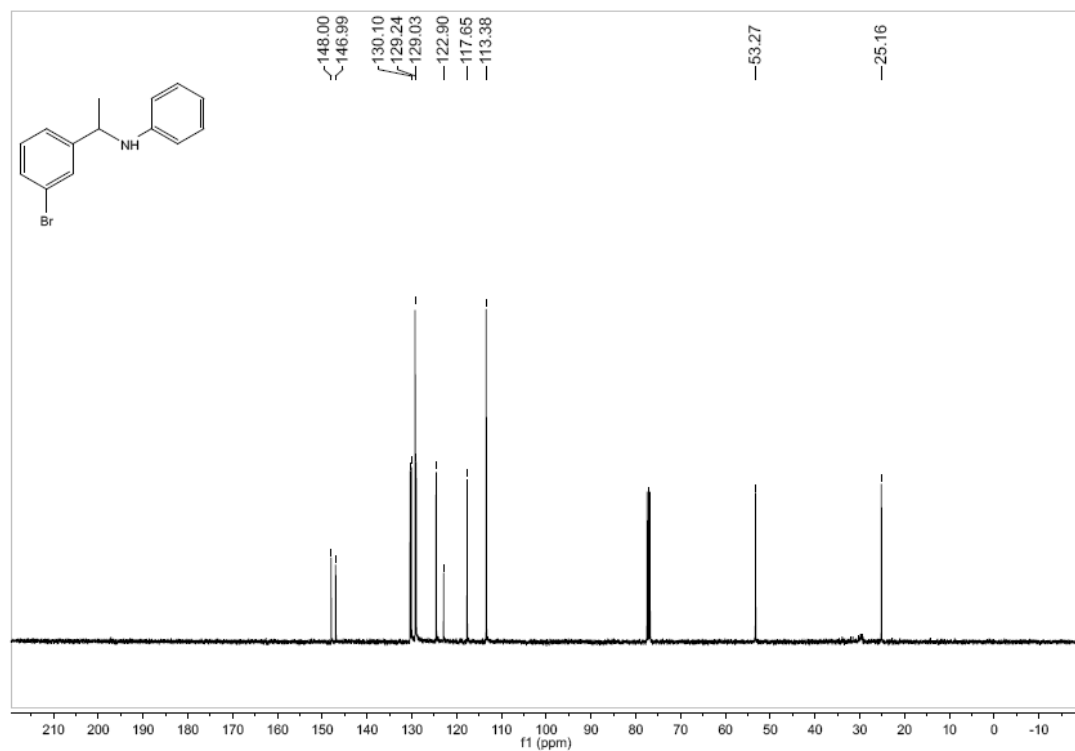

10<sup>e</sup>

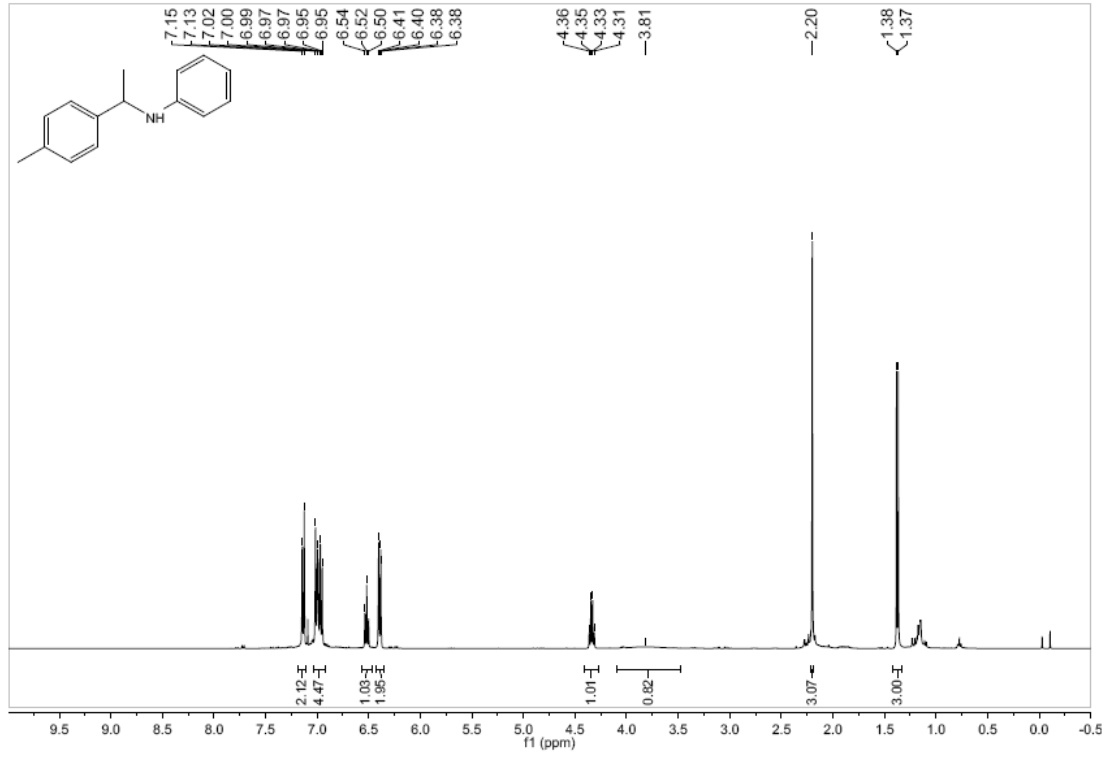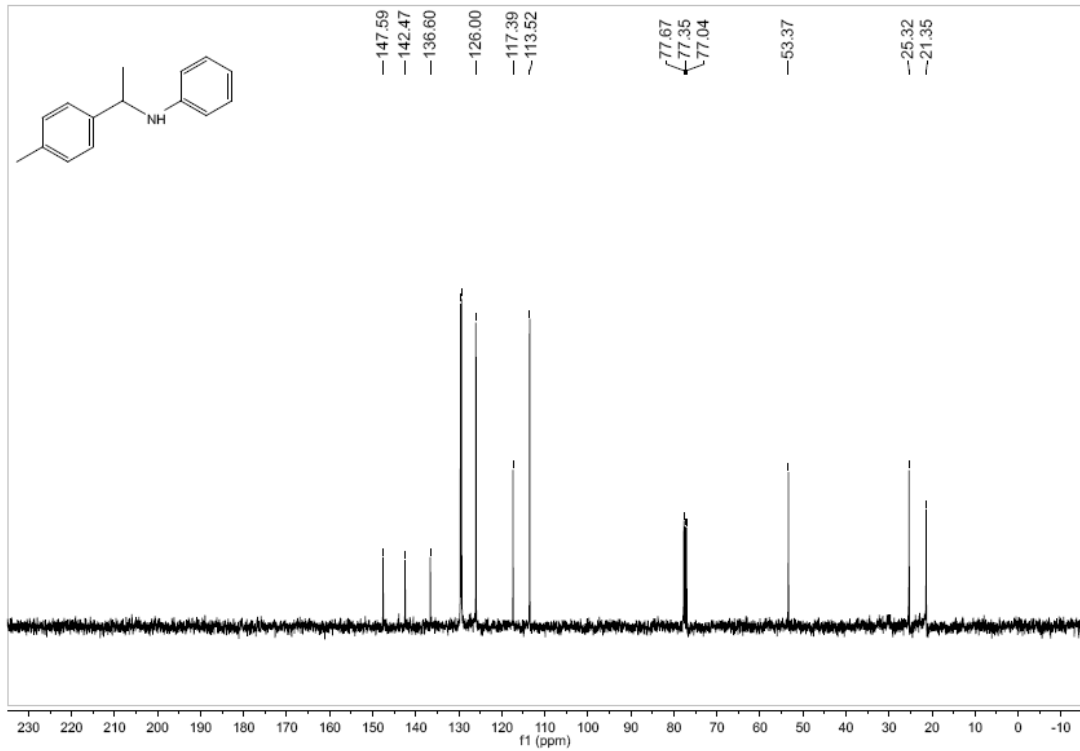

10f

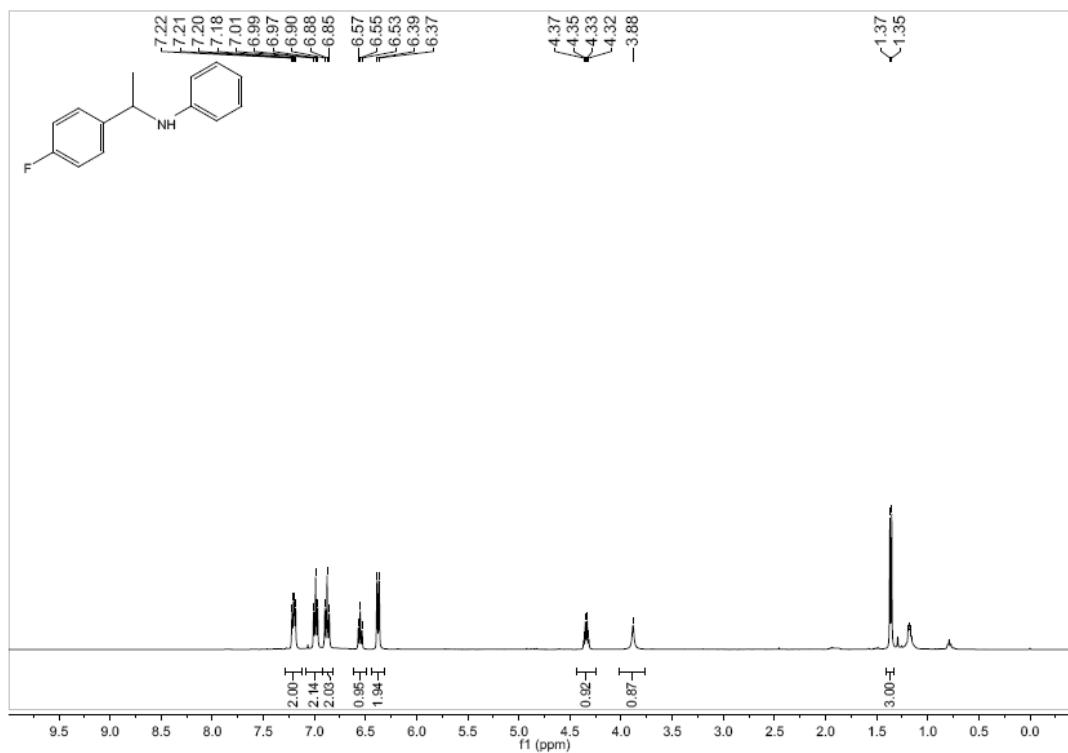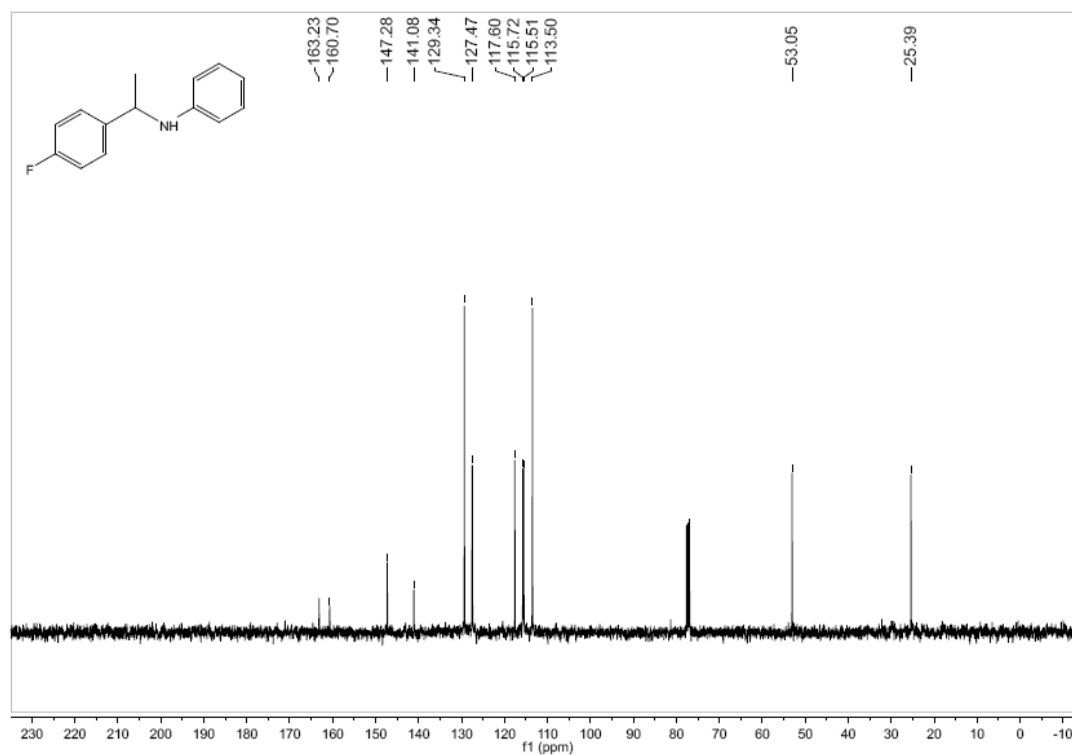

10g

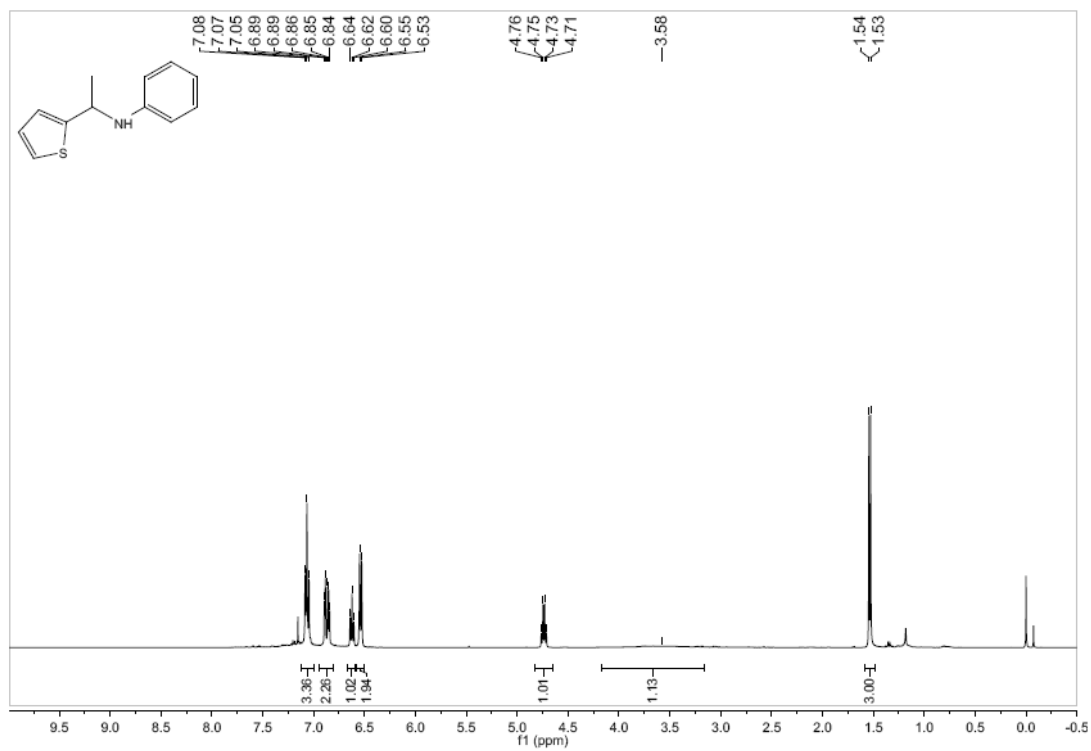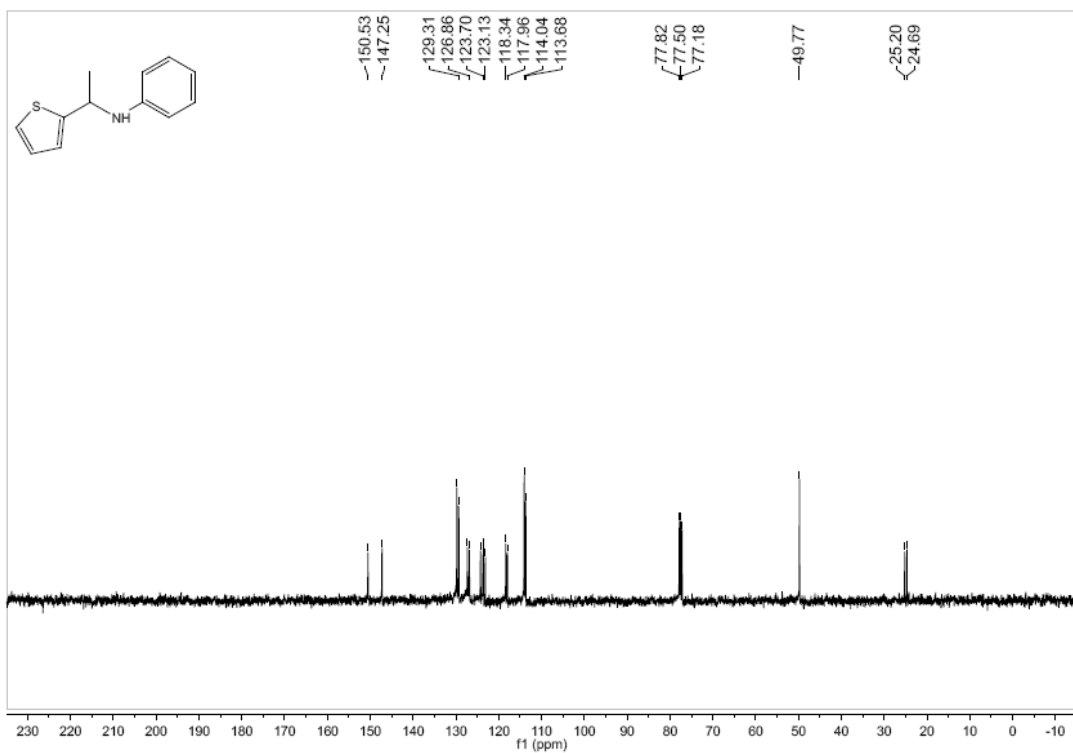

10h

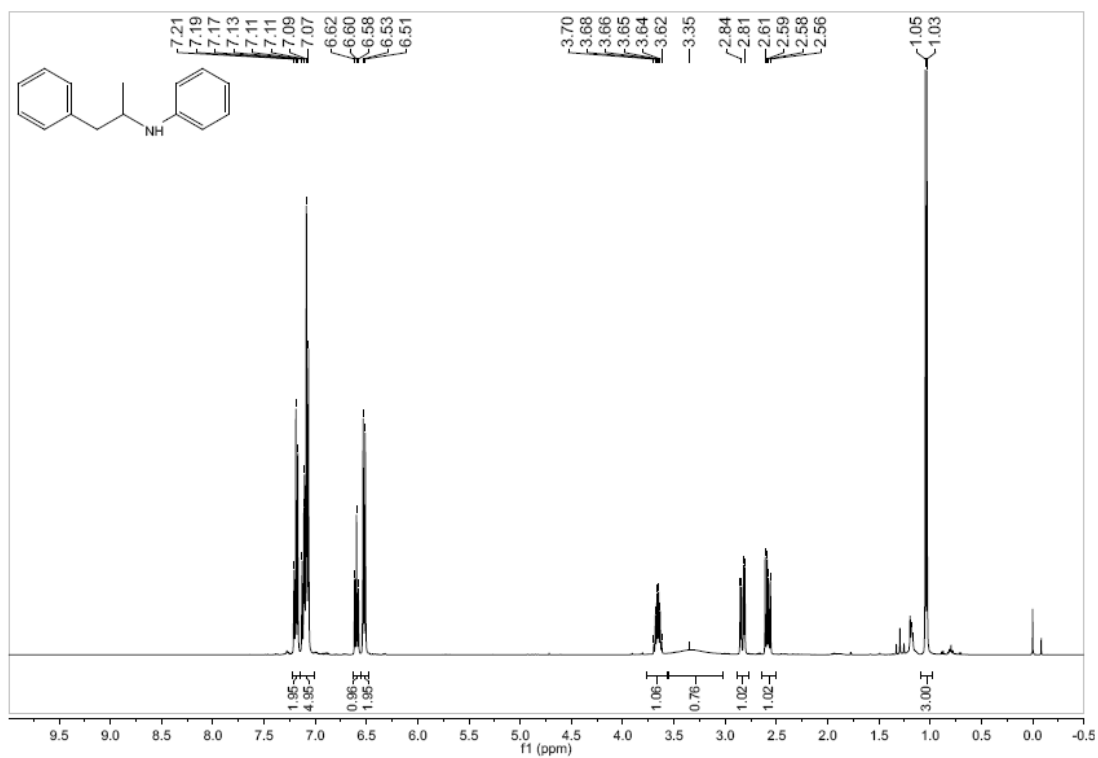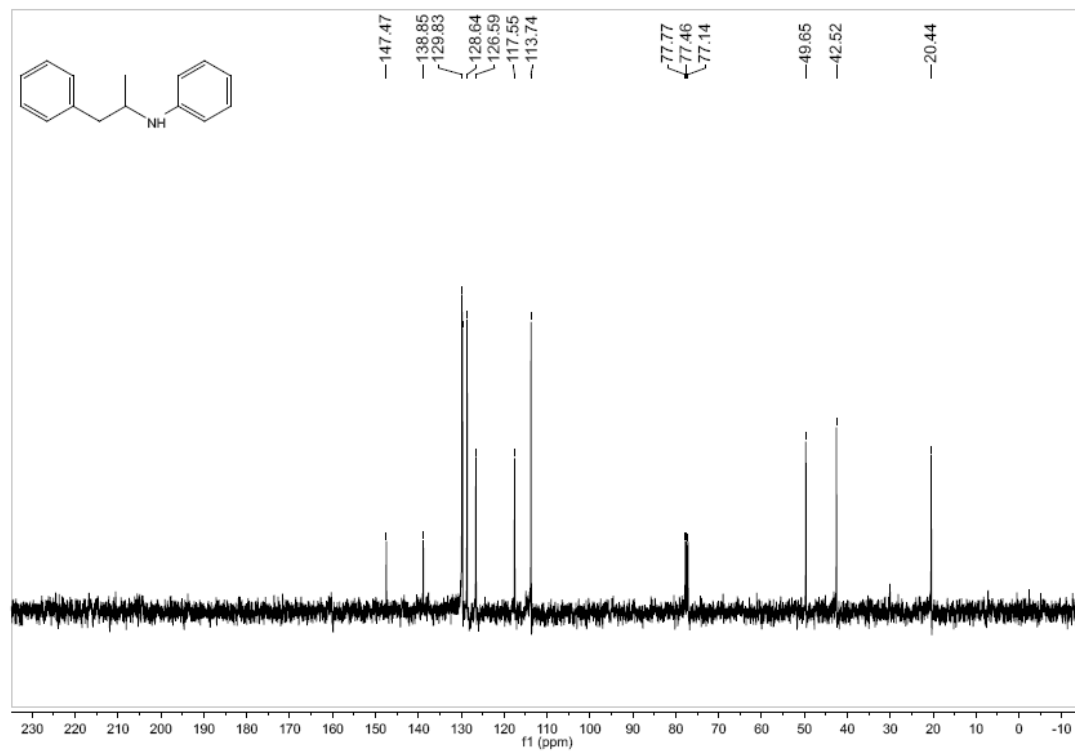

10i

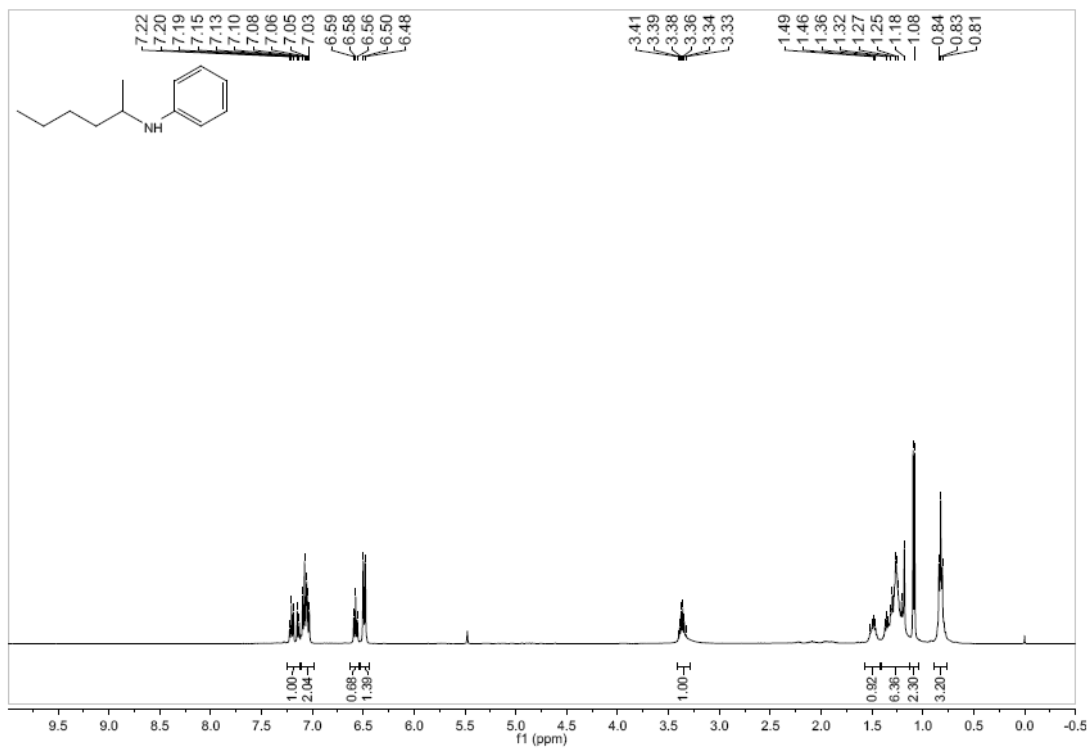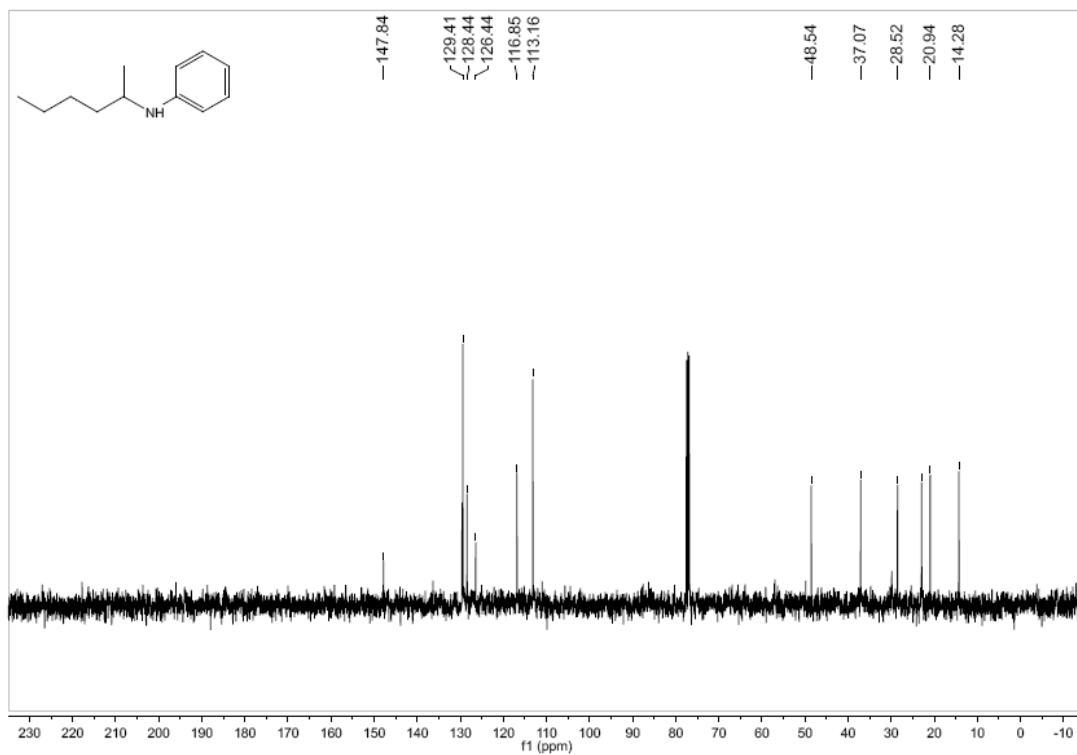



10j

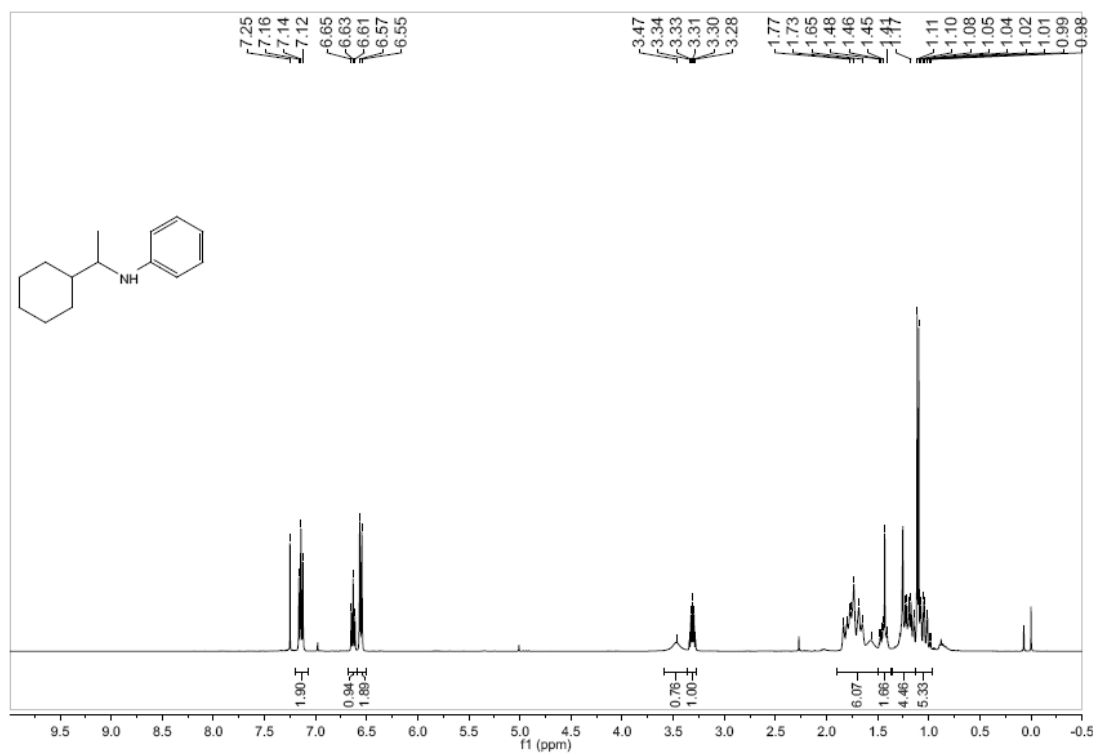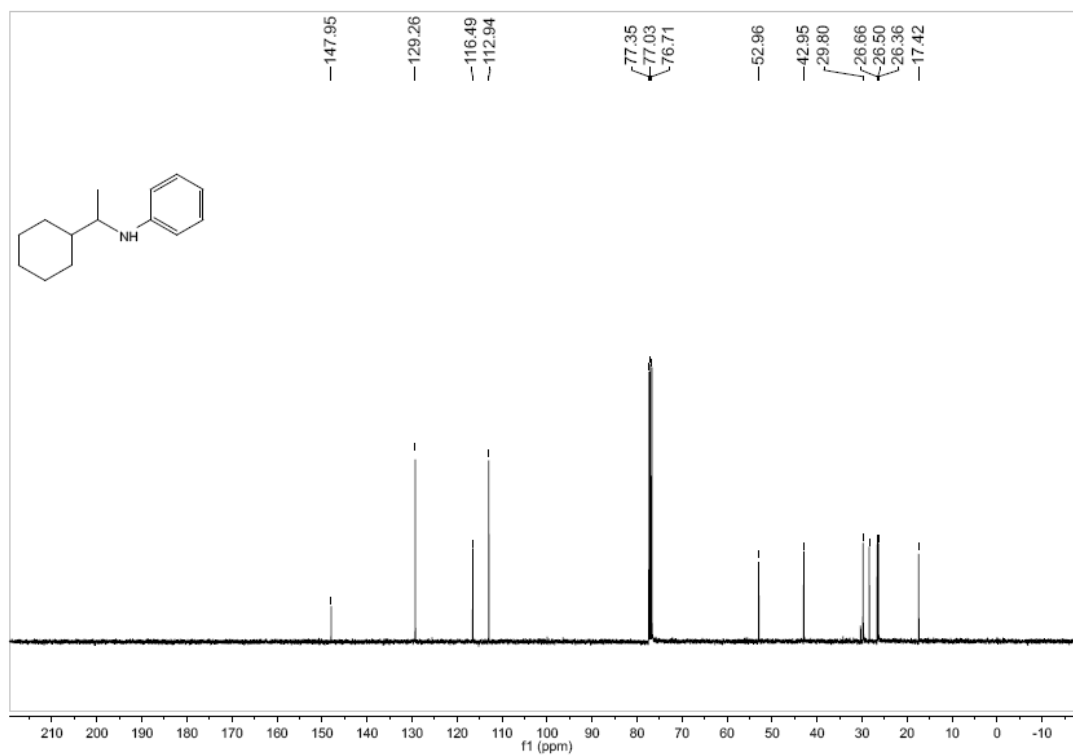

10k

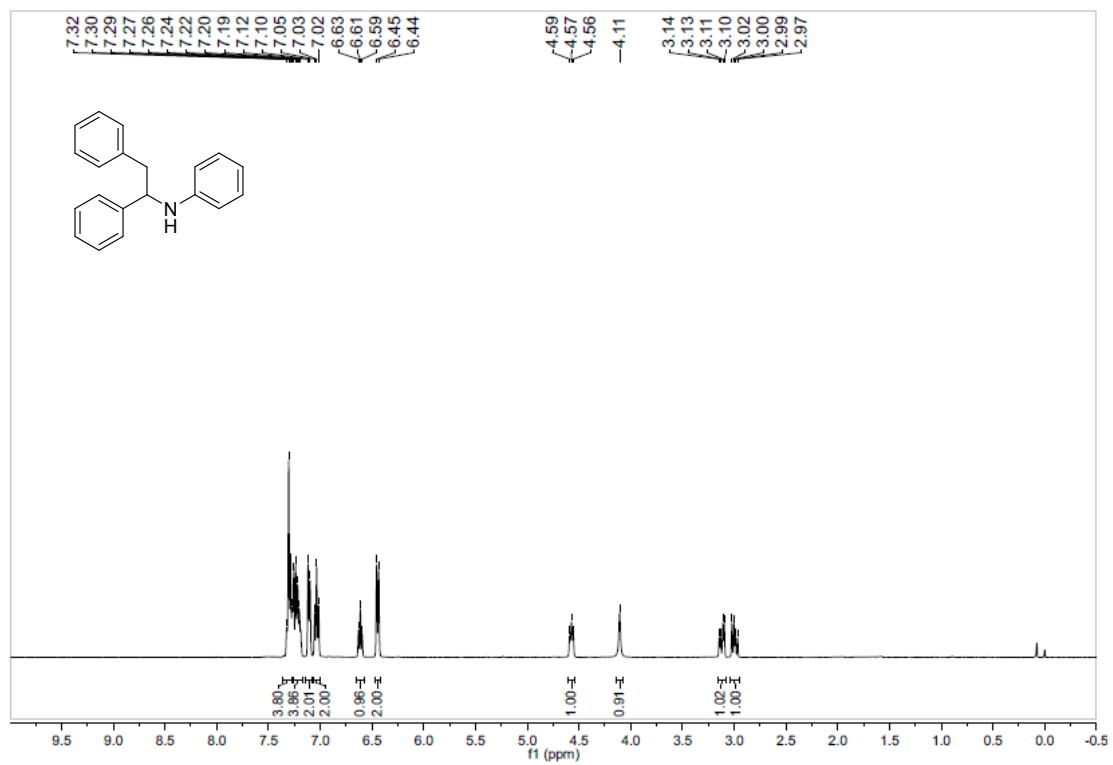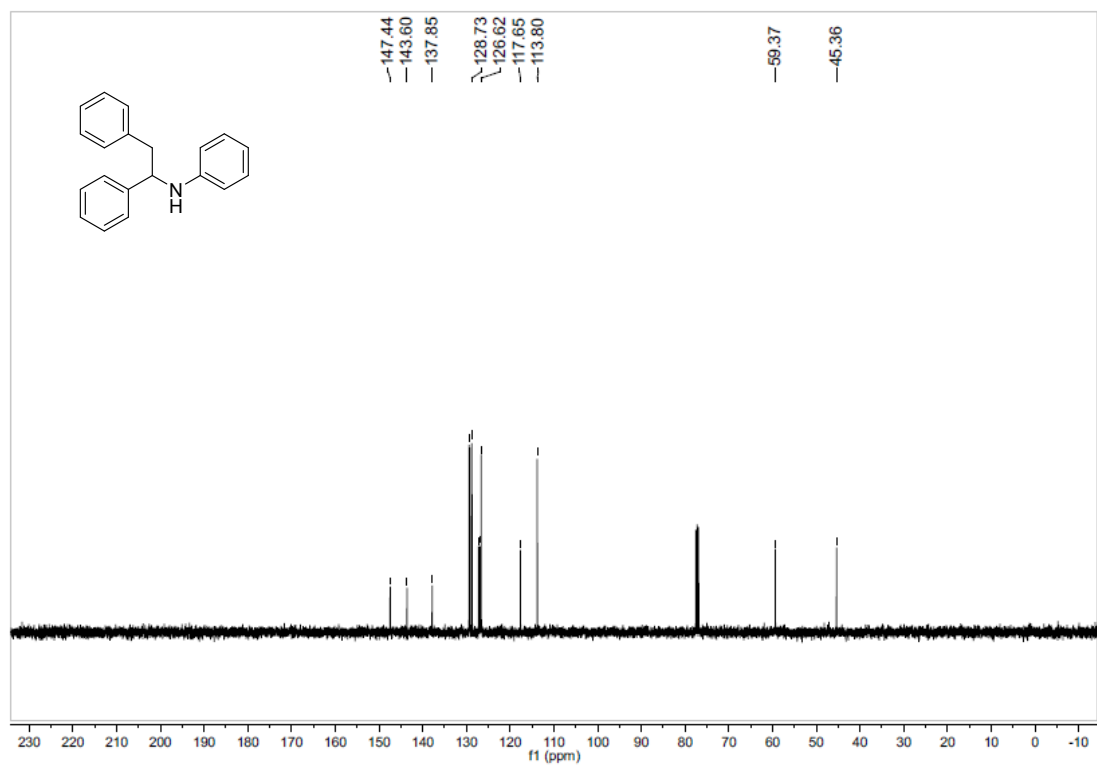

11a

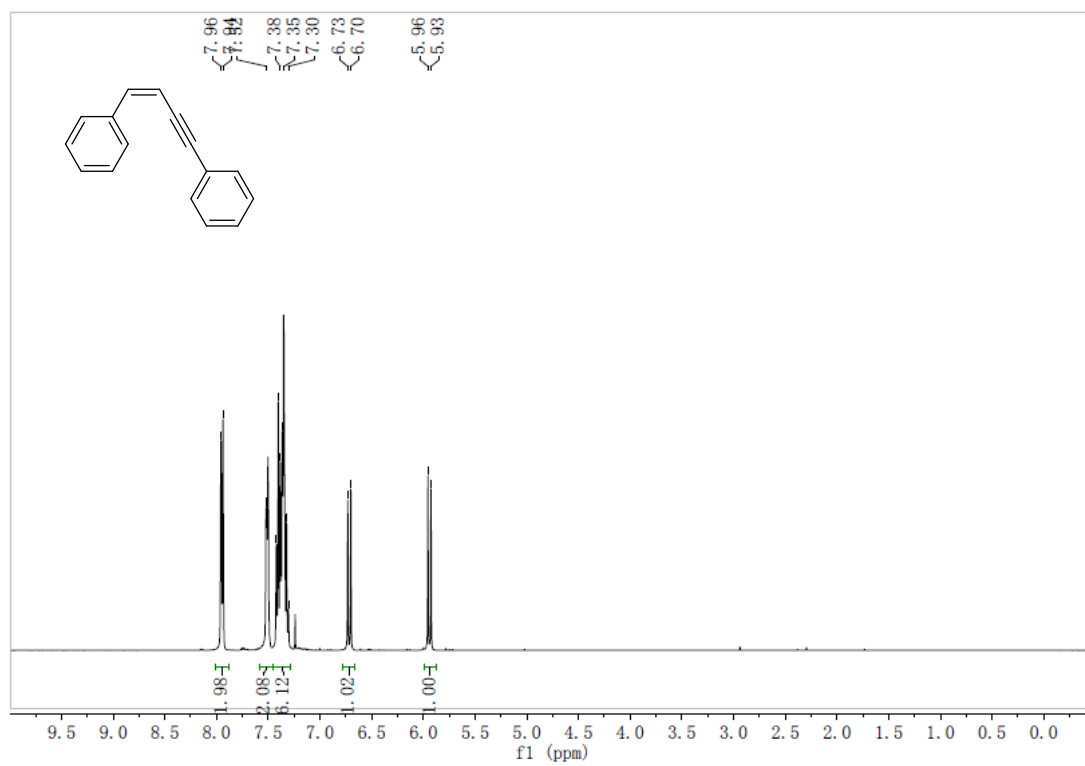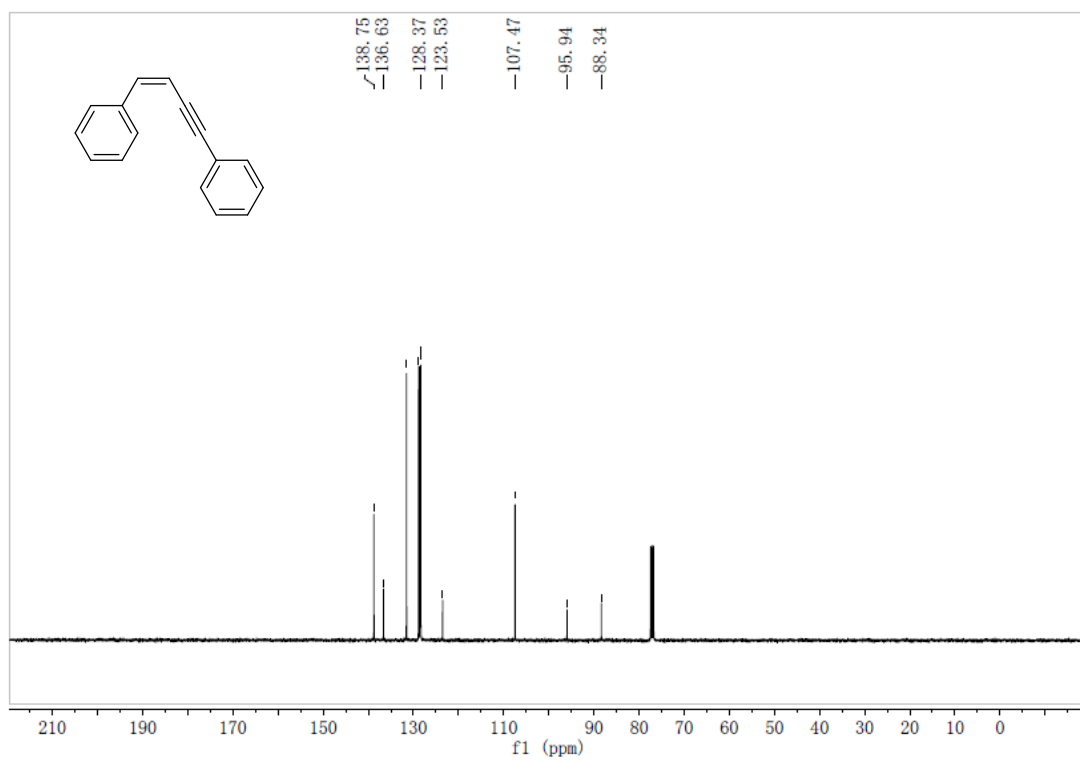

12b

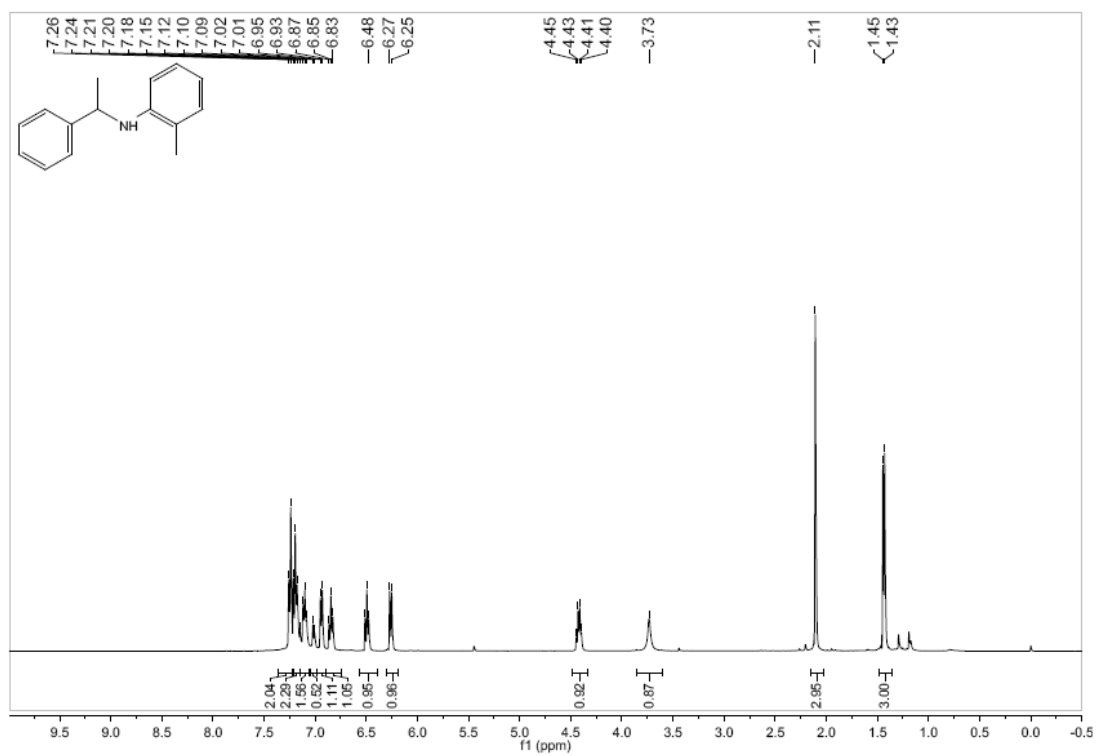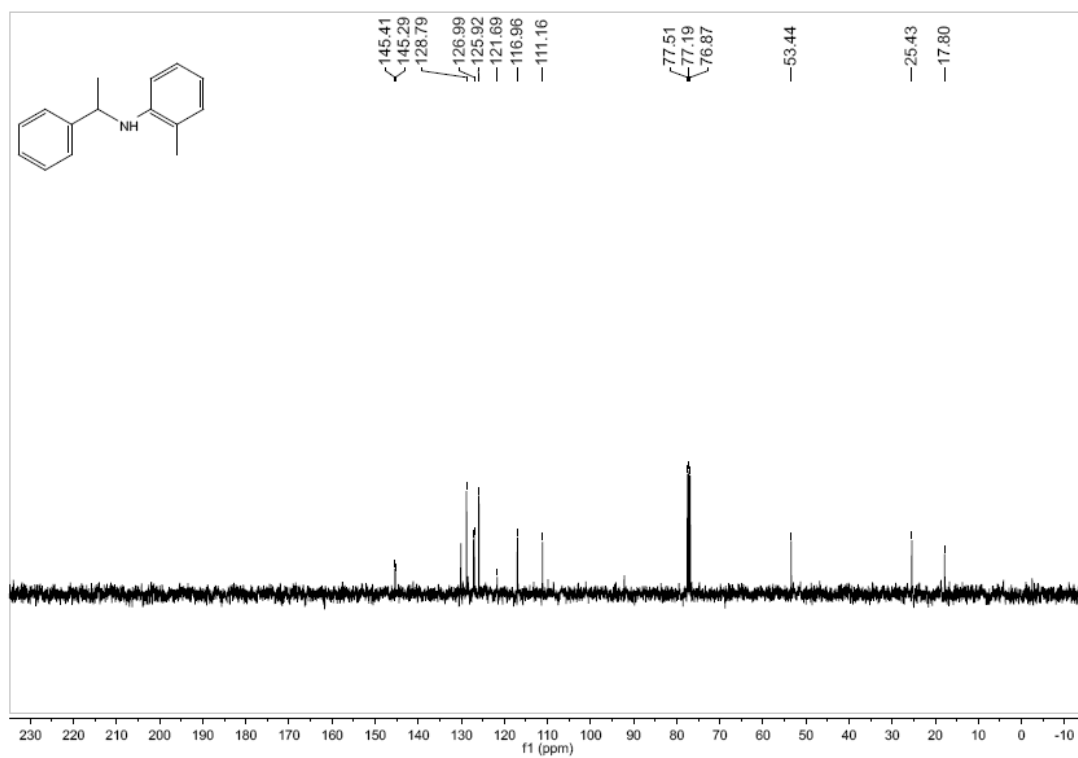

12c

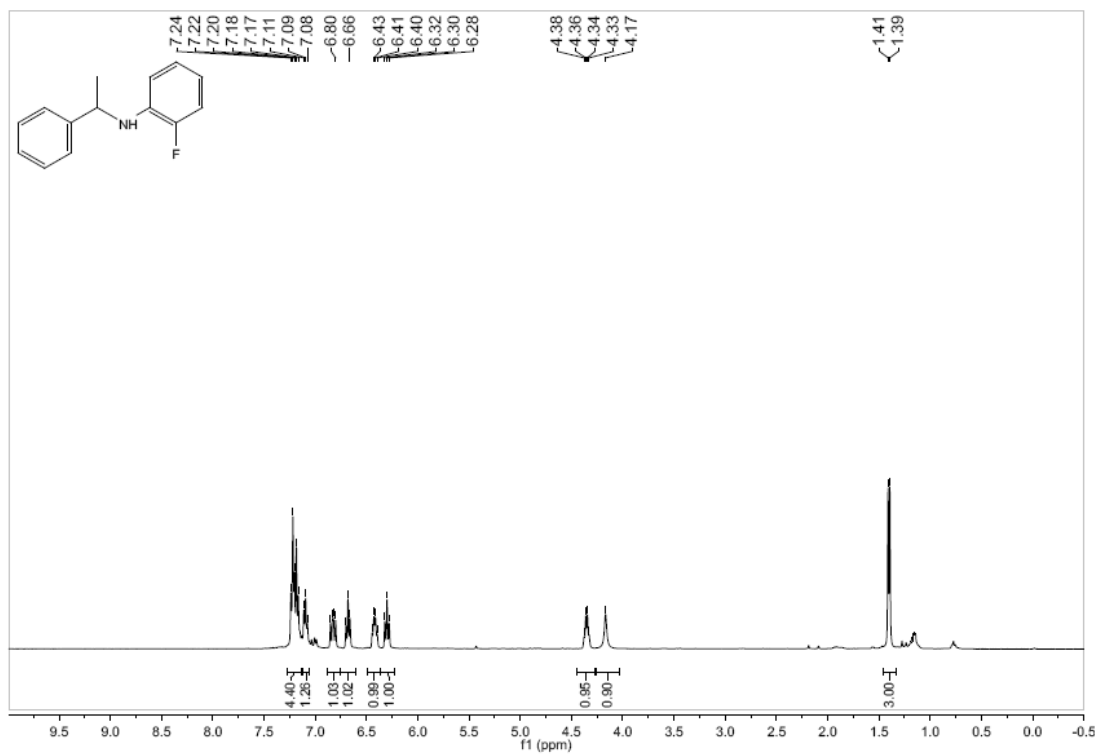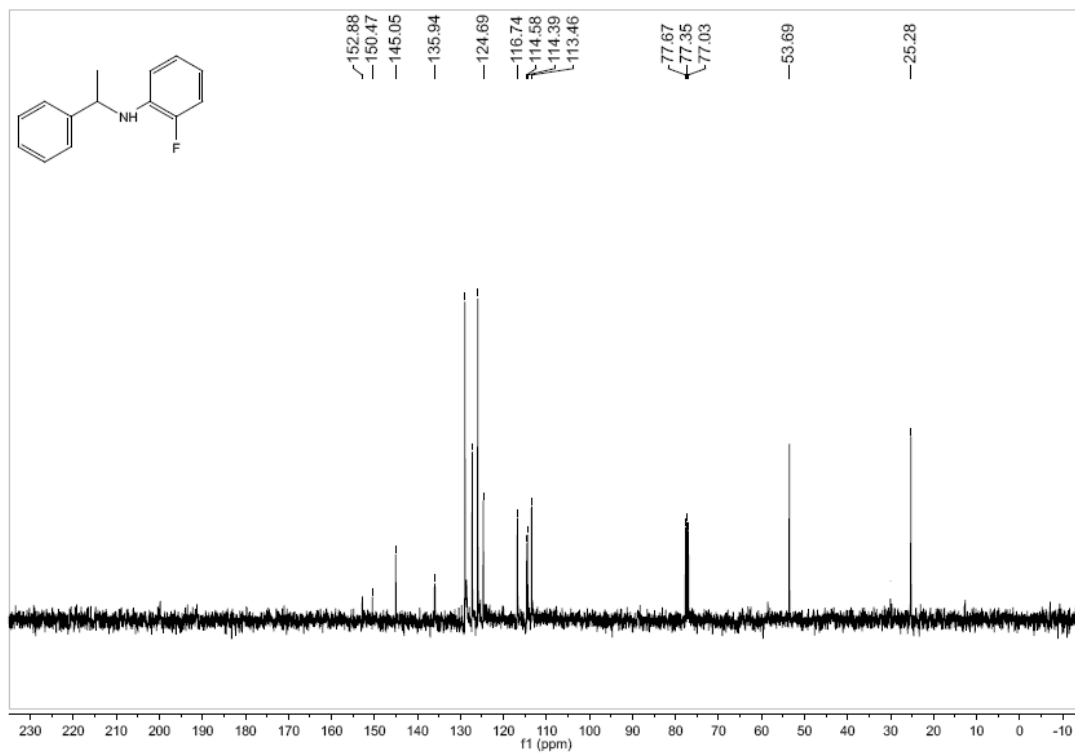

12d

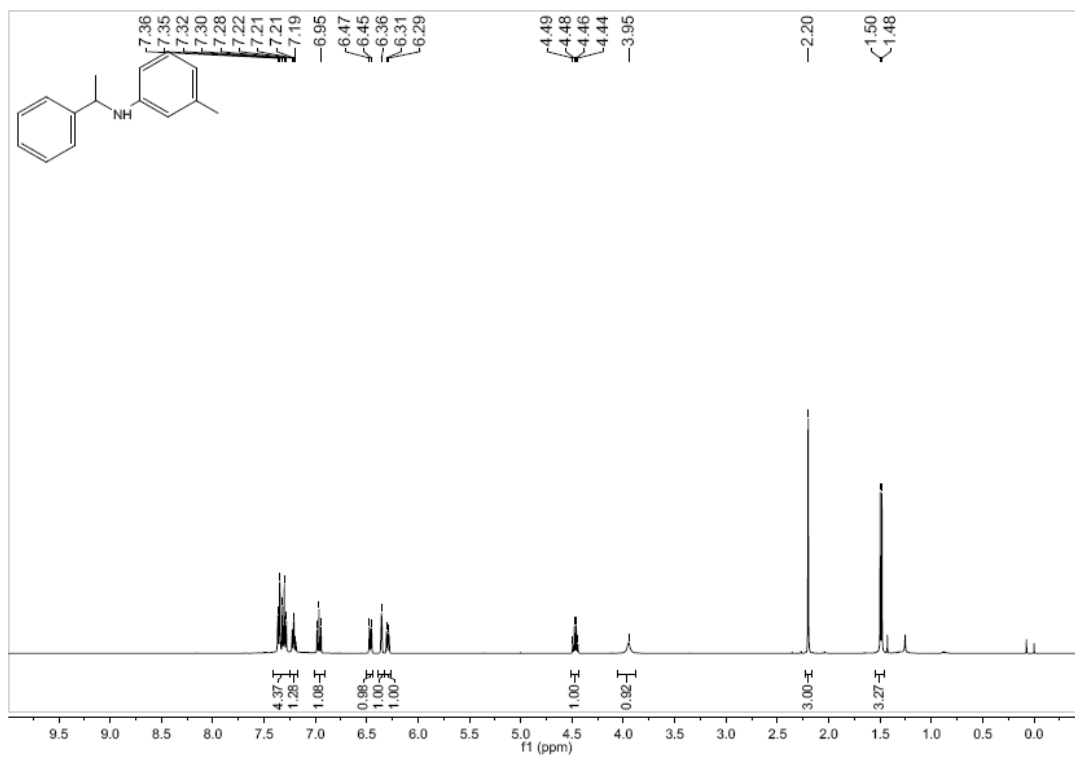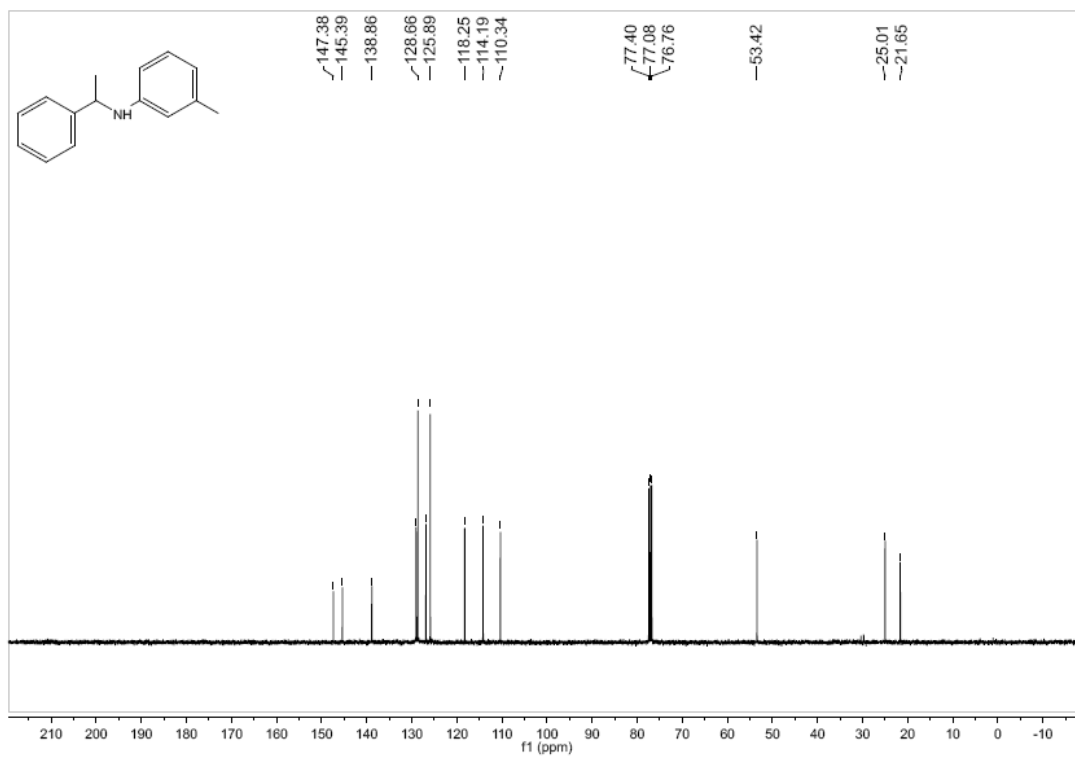

12e

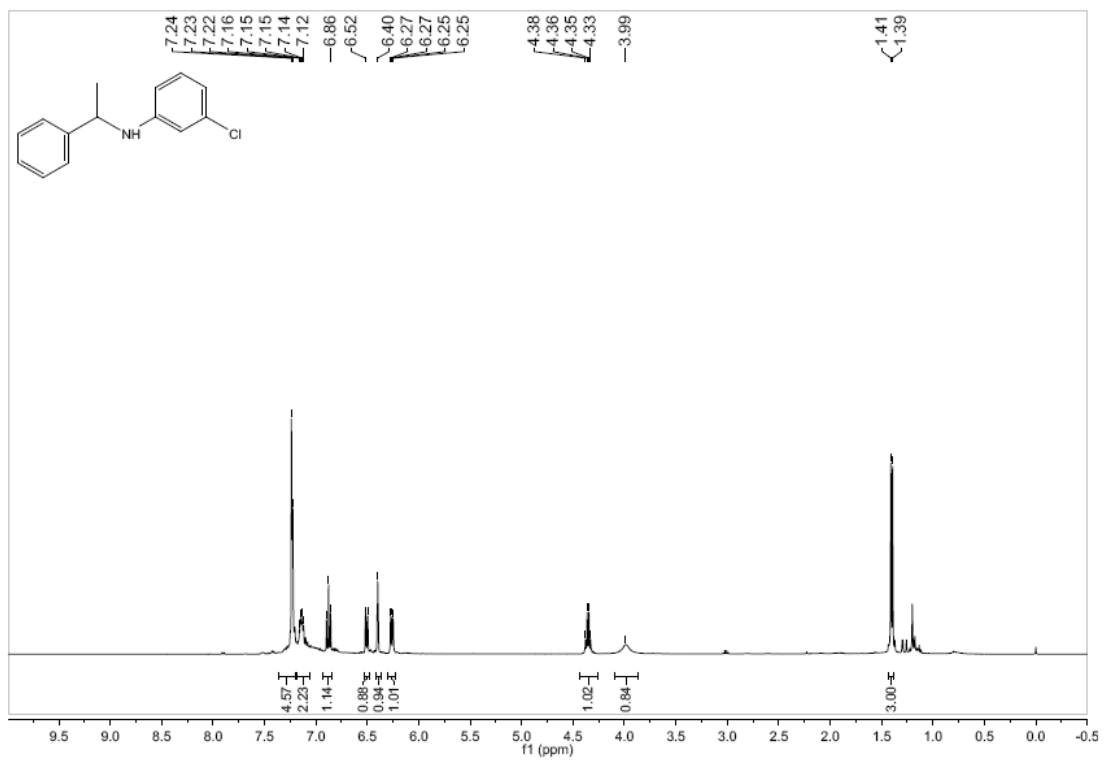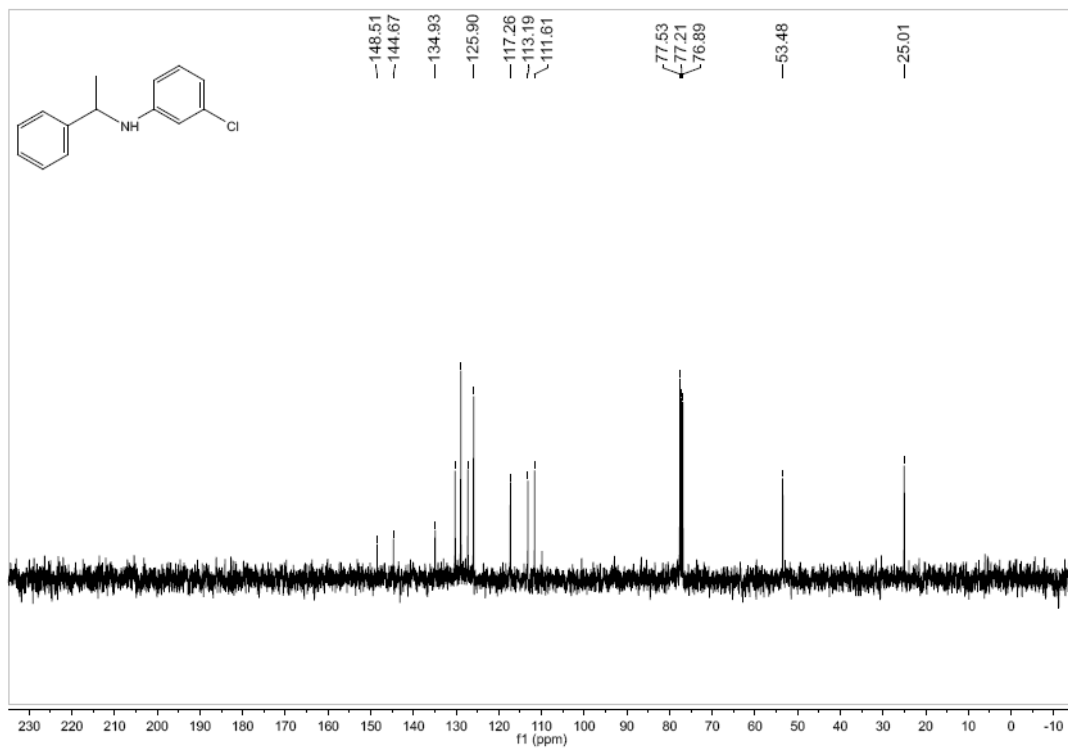

12f

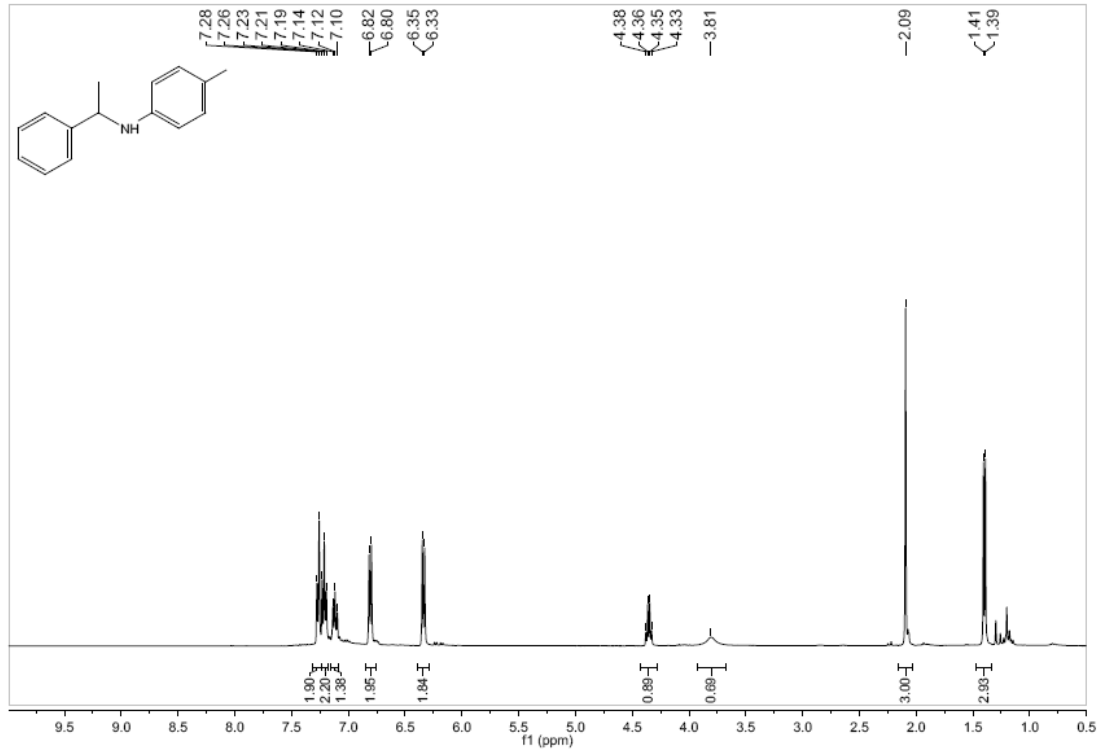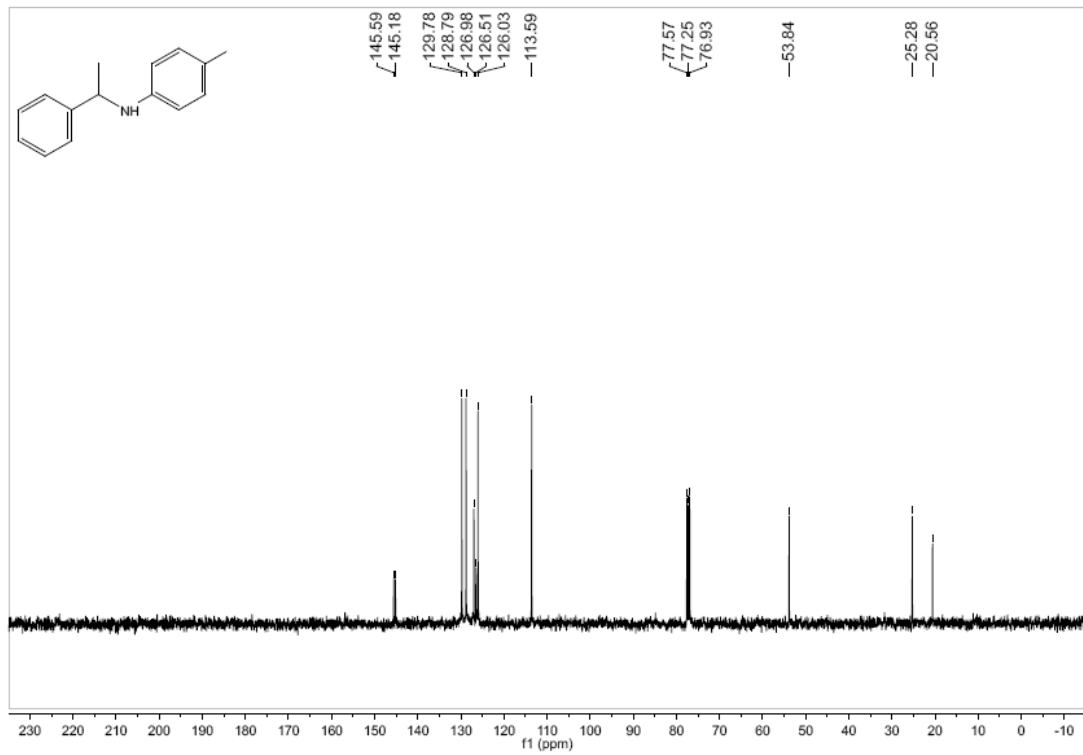



12g

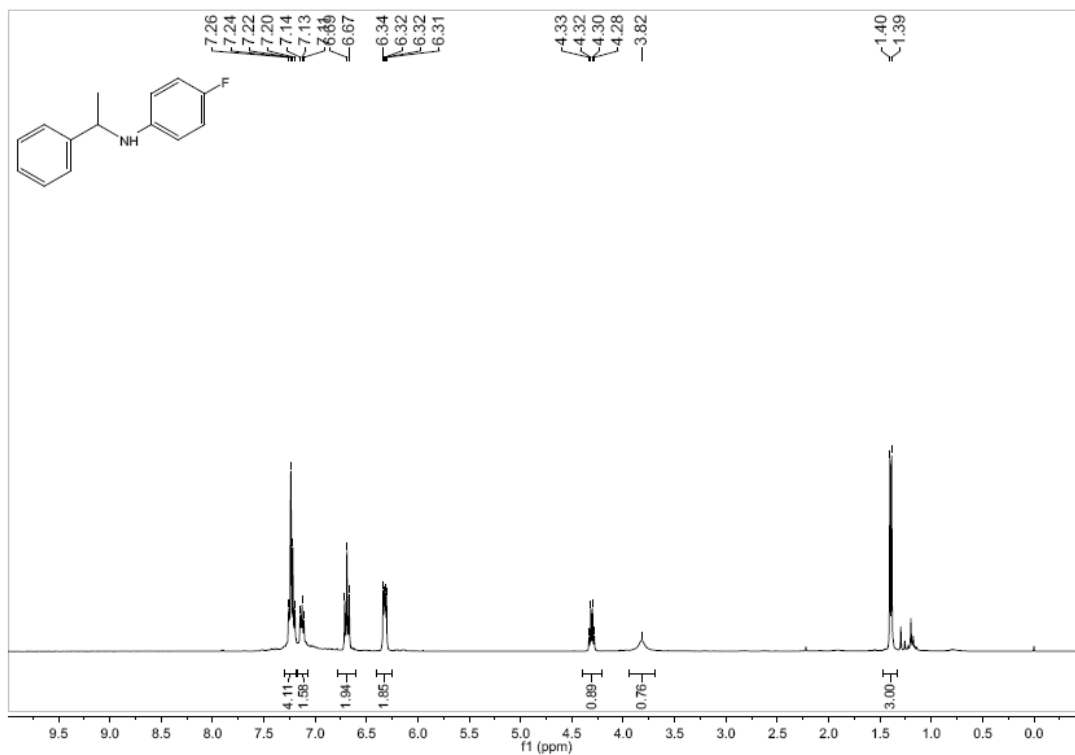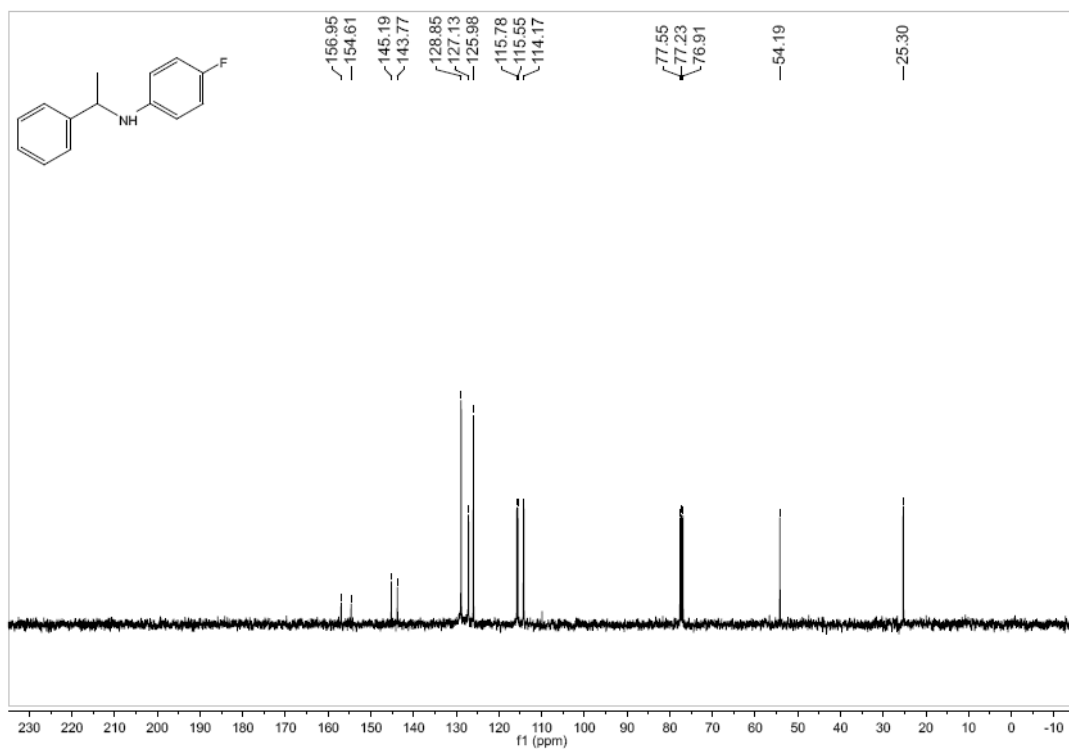

12h

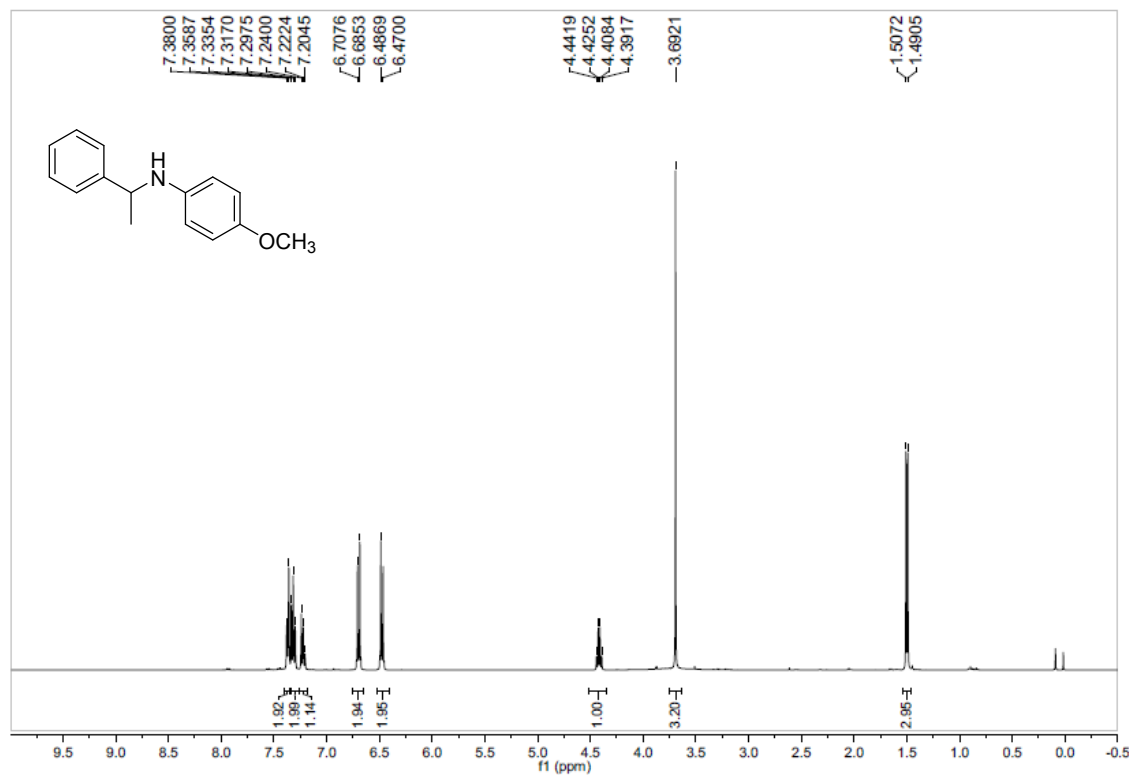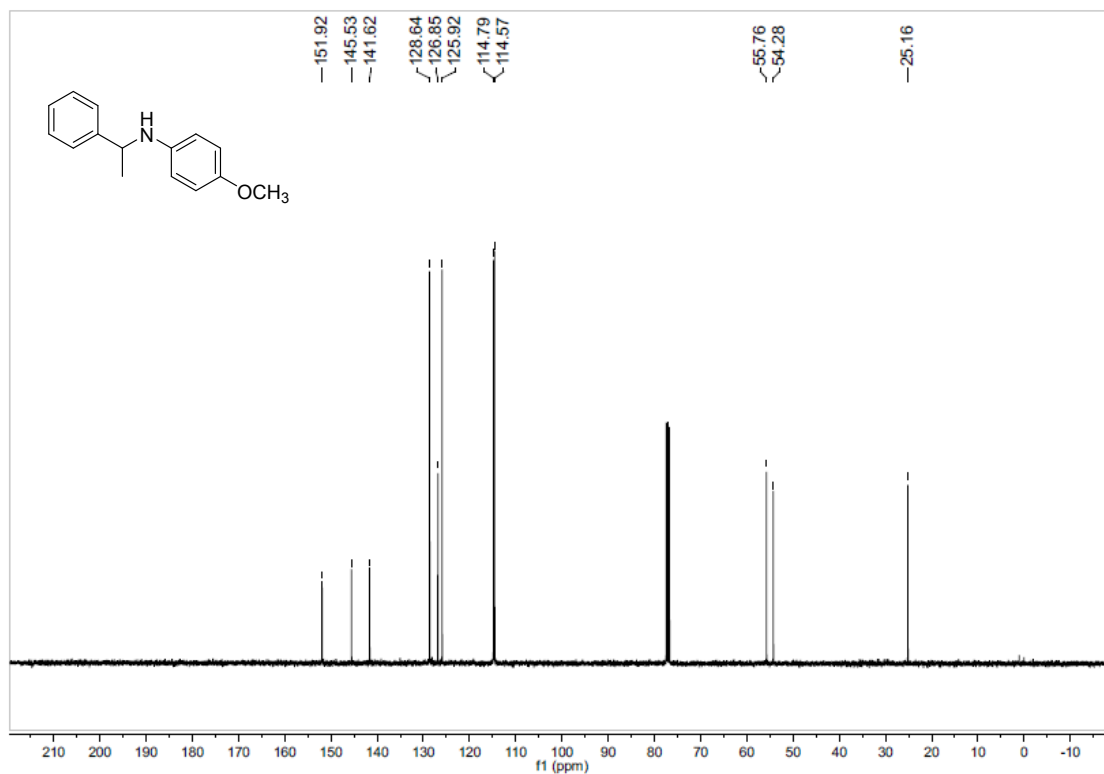

12i

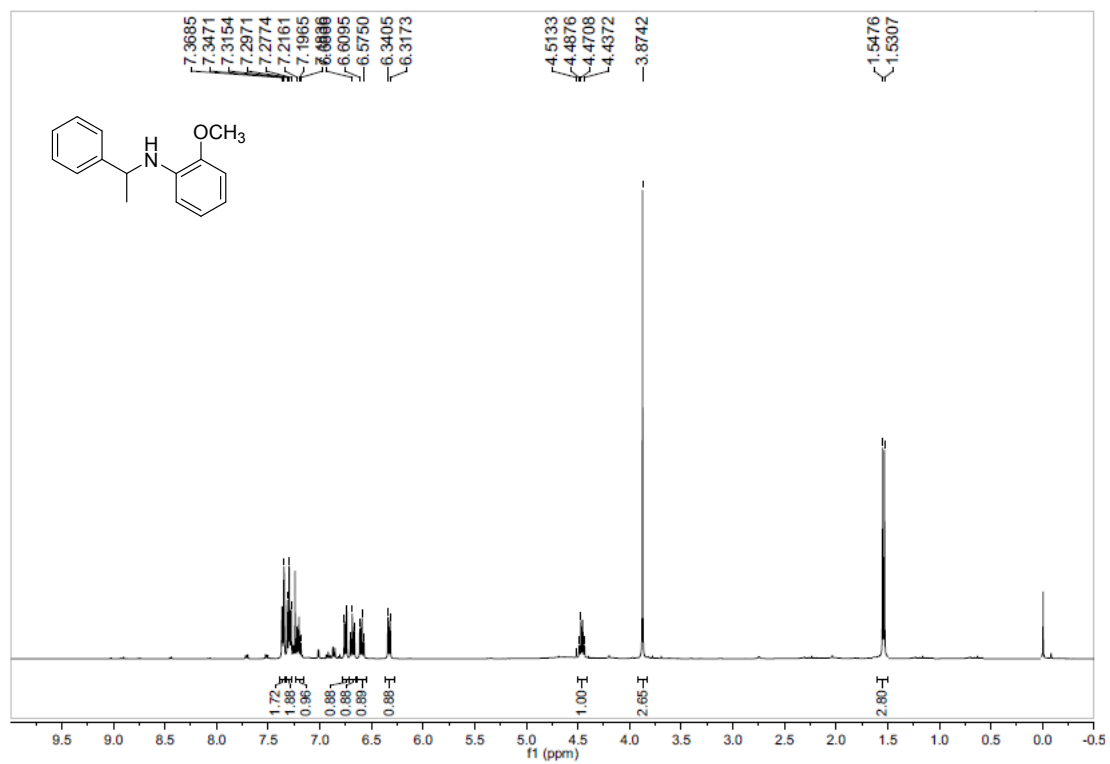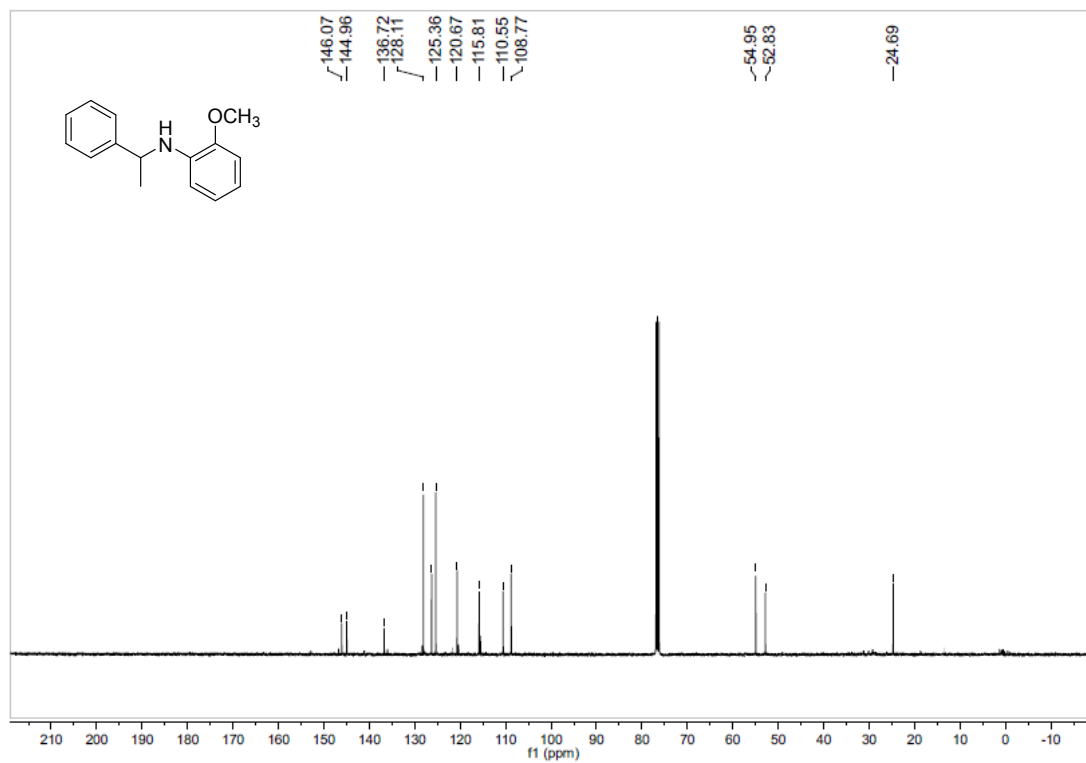

12j

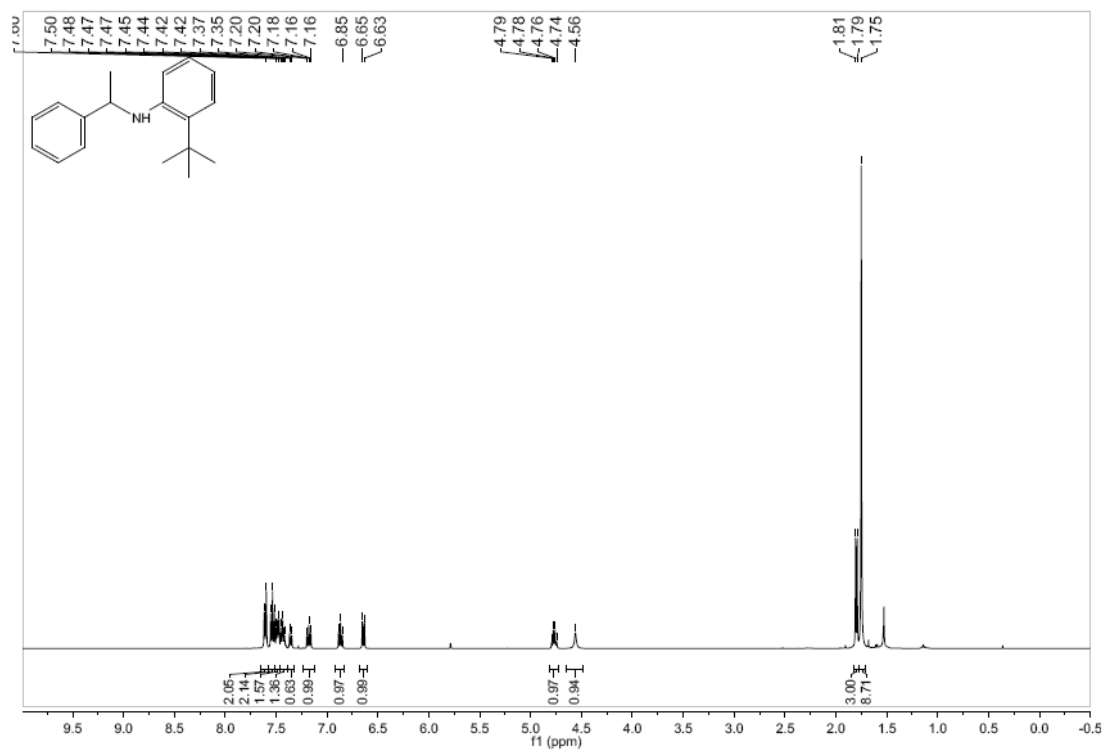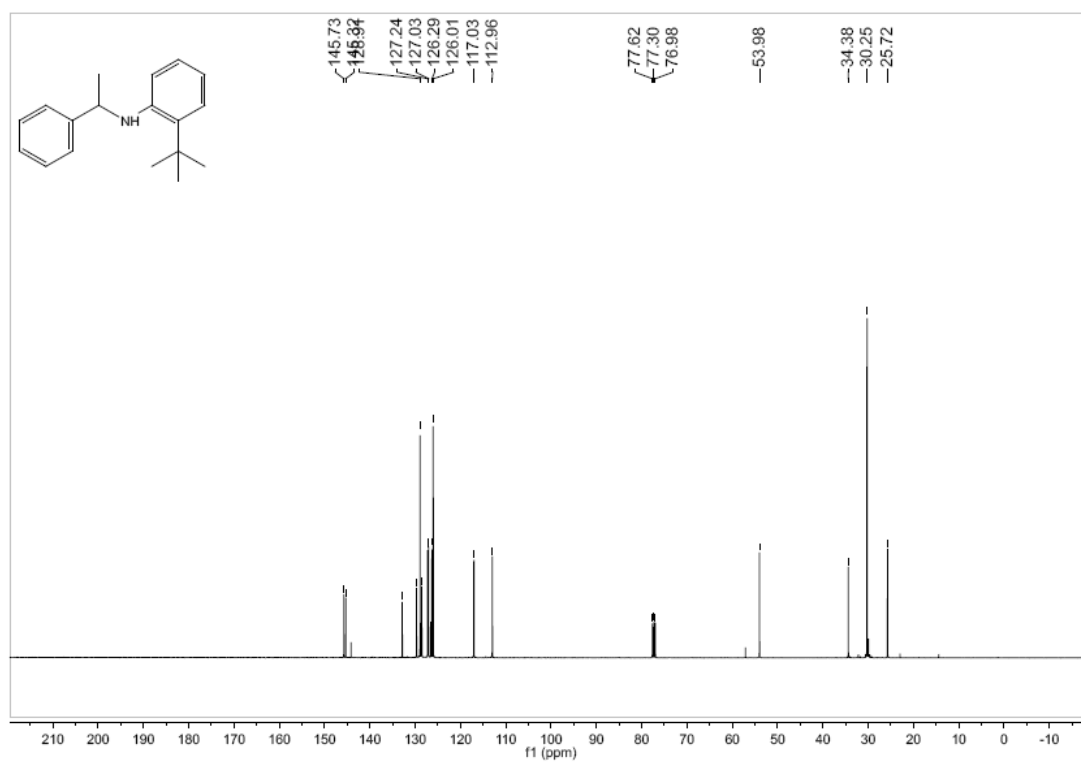

12k

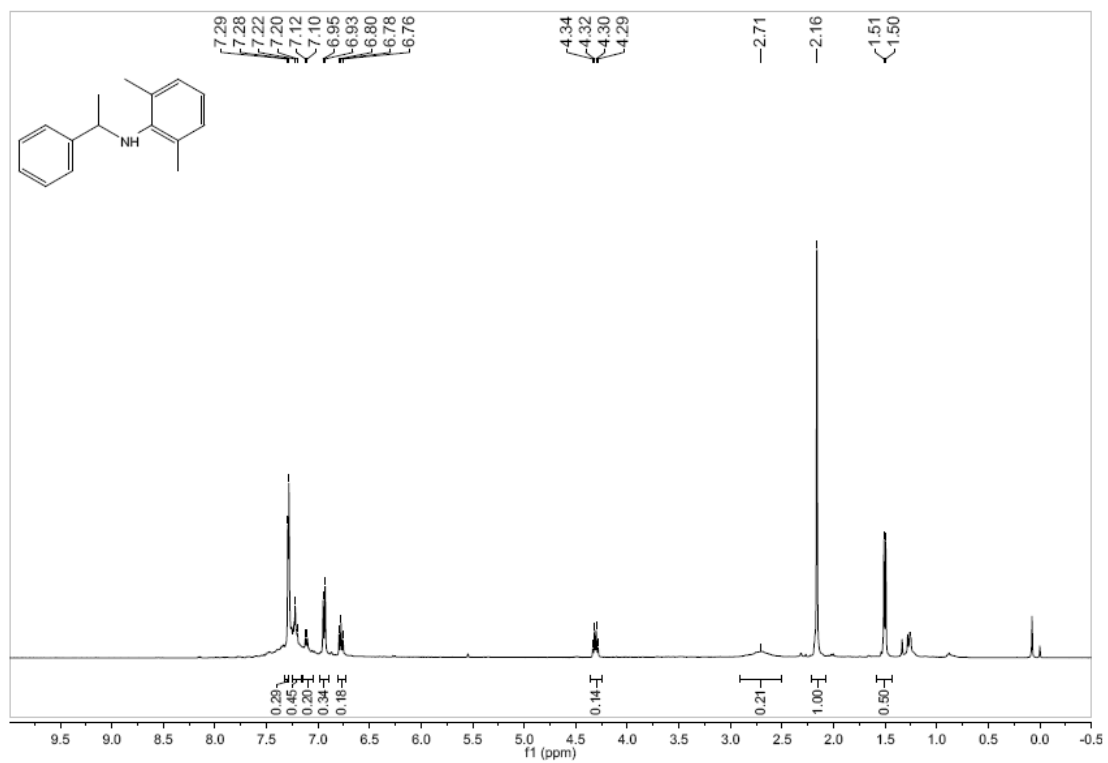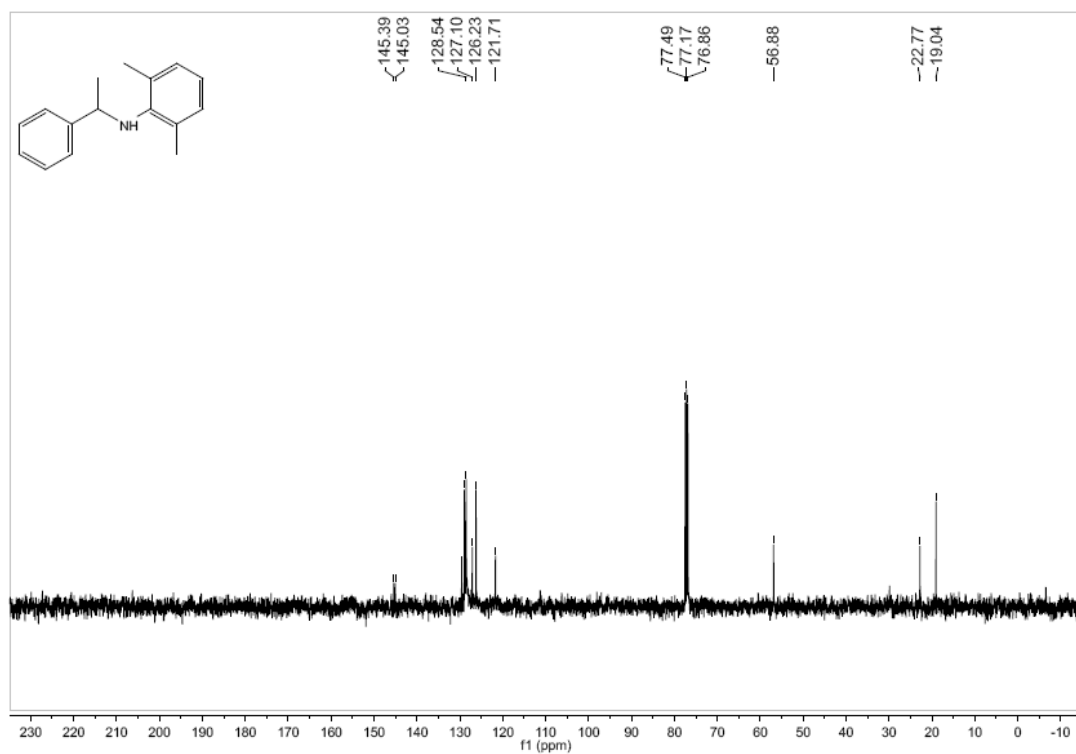

12I

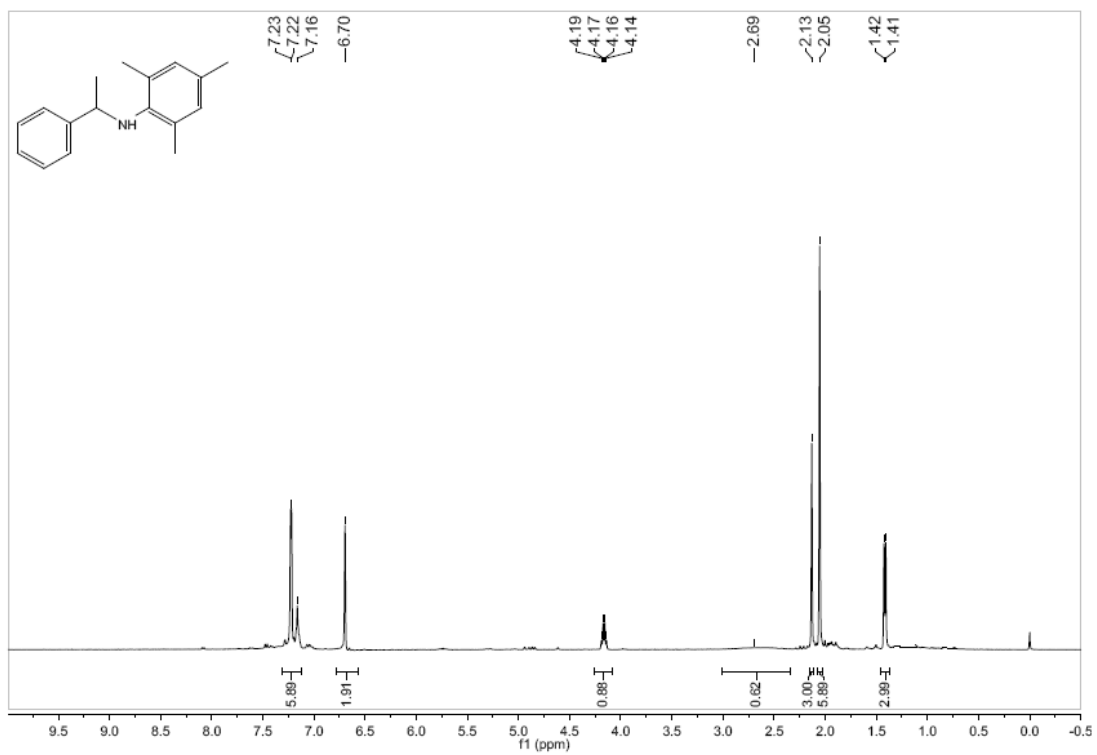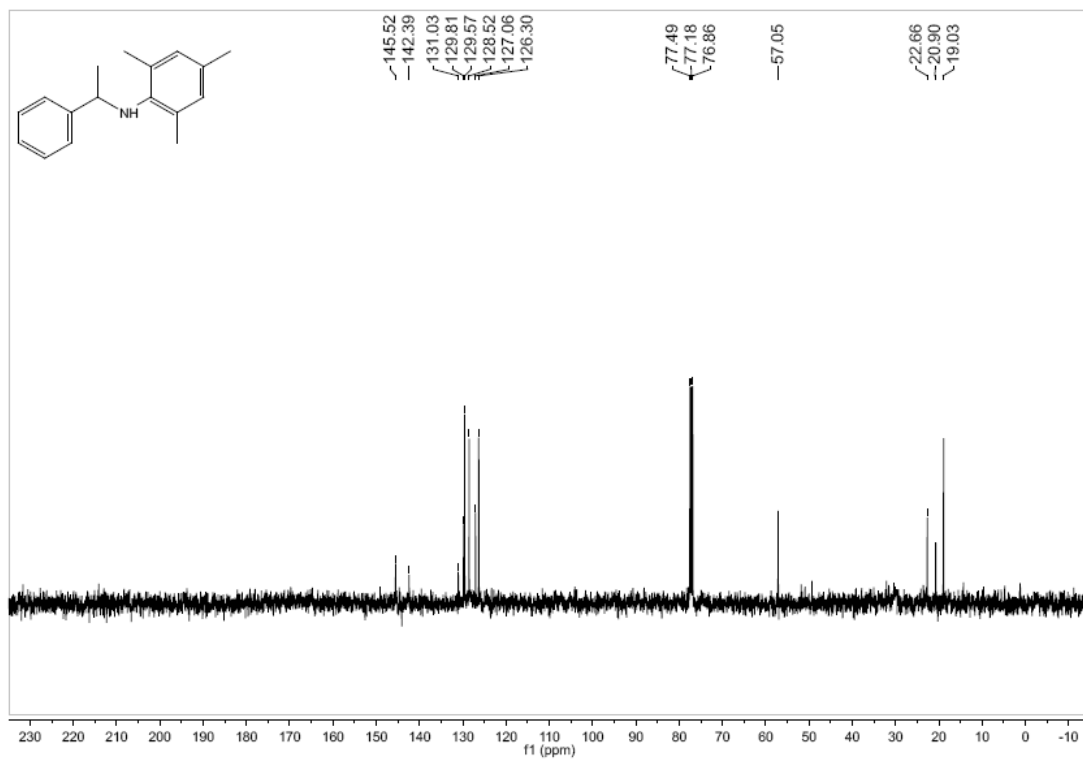

12s

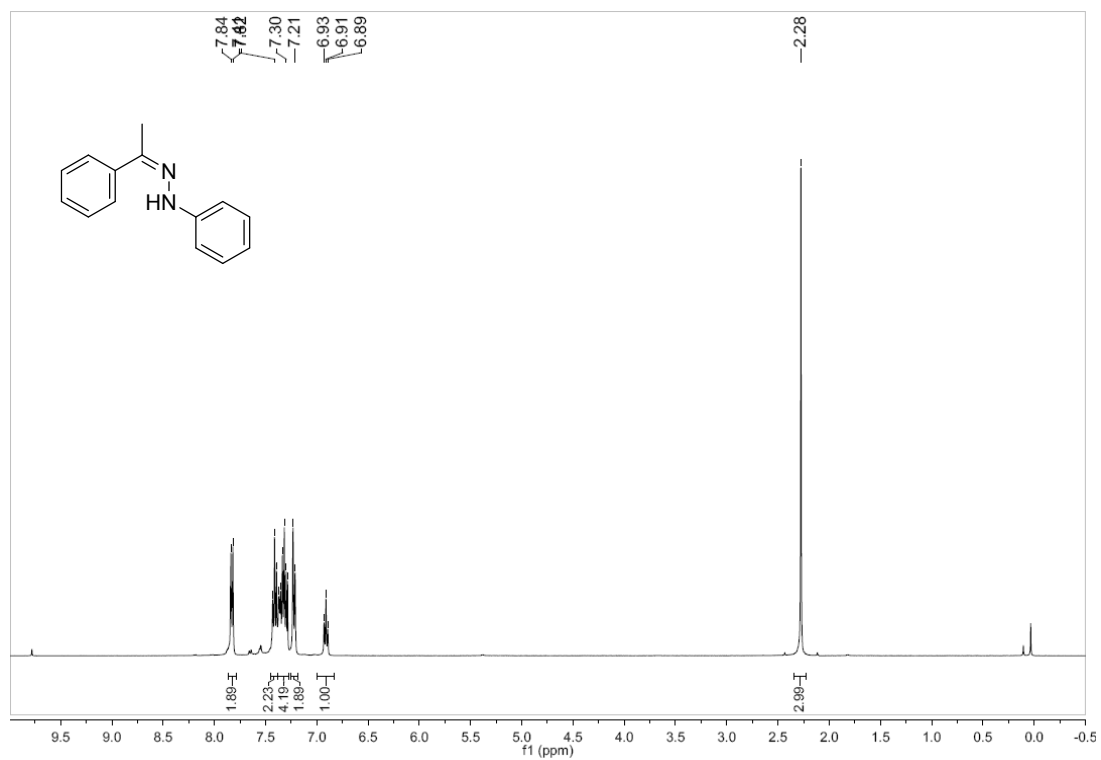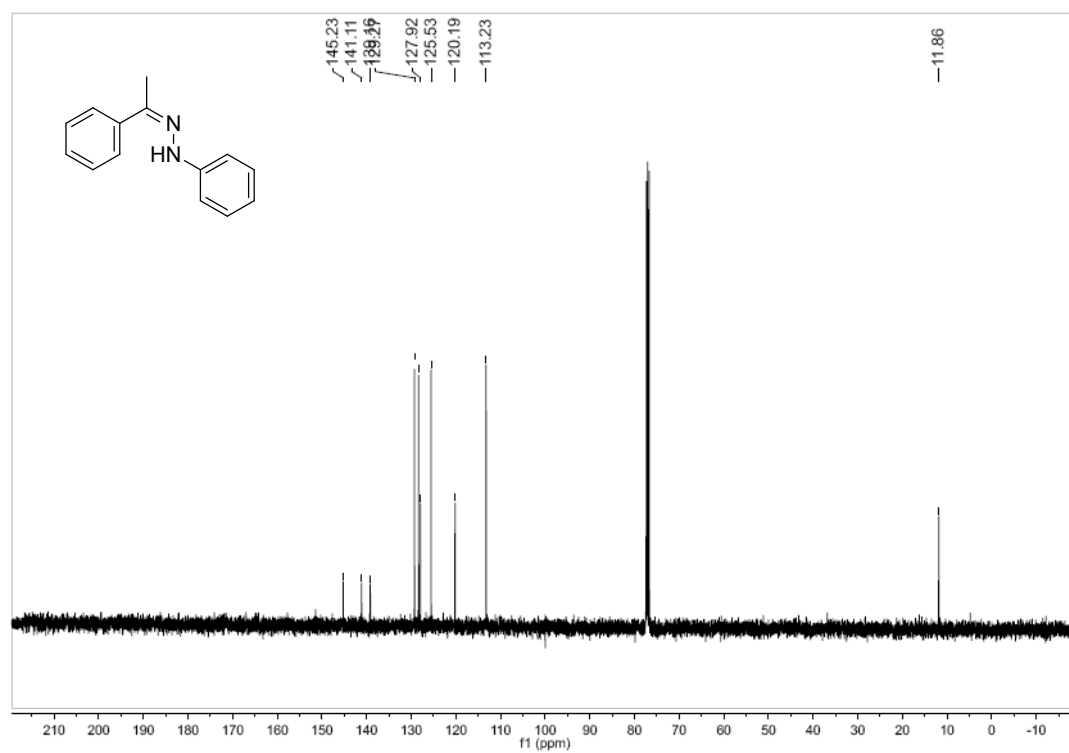

12t

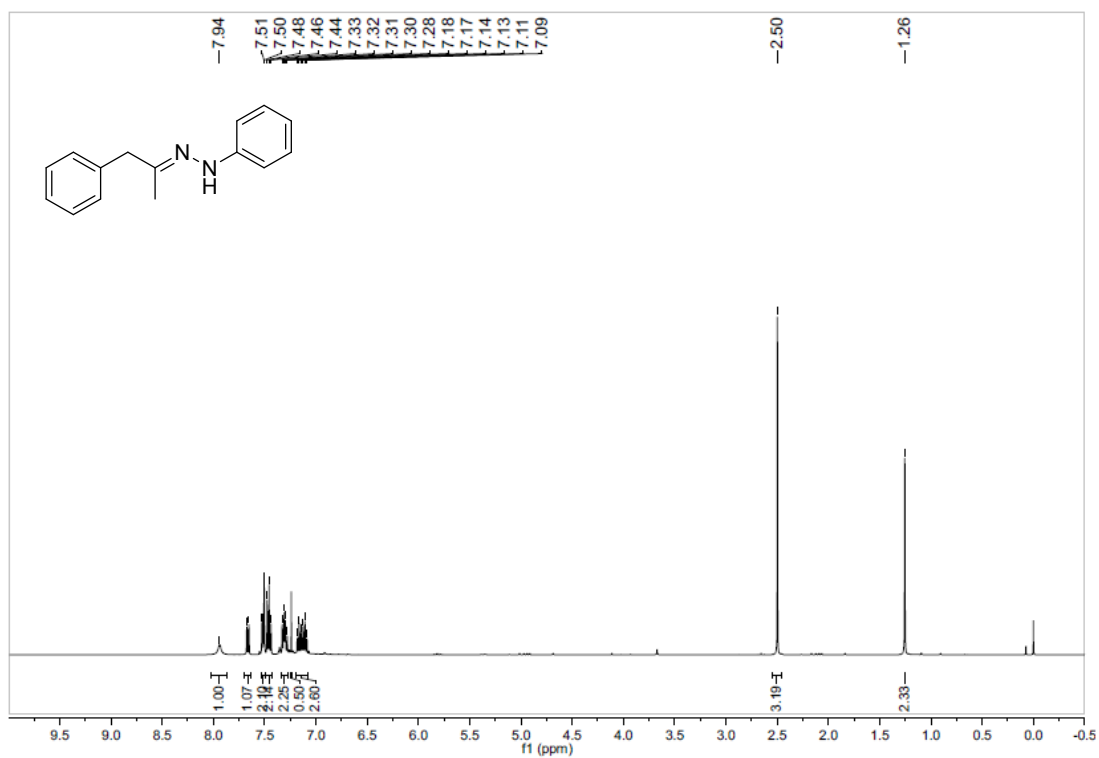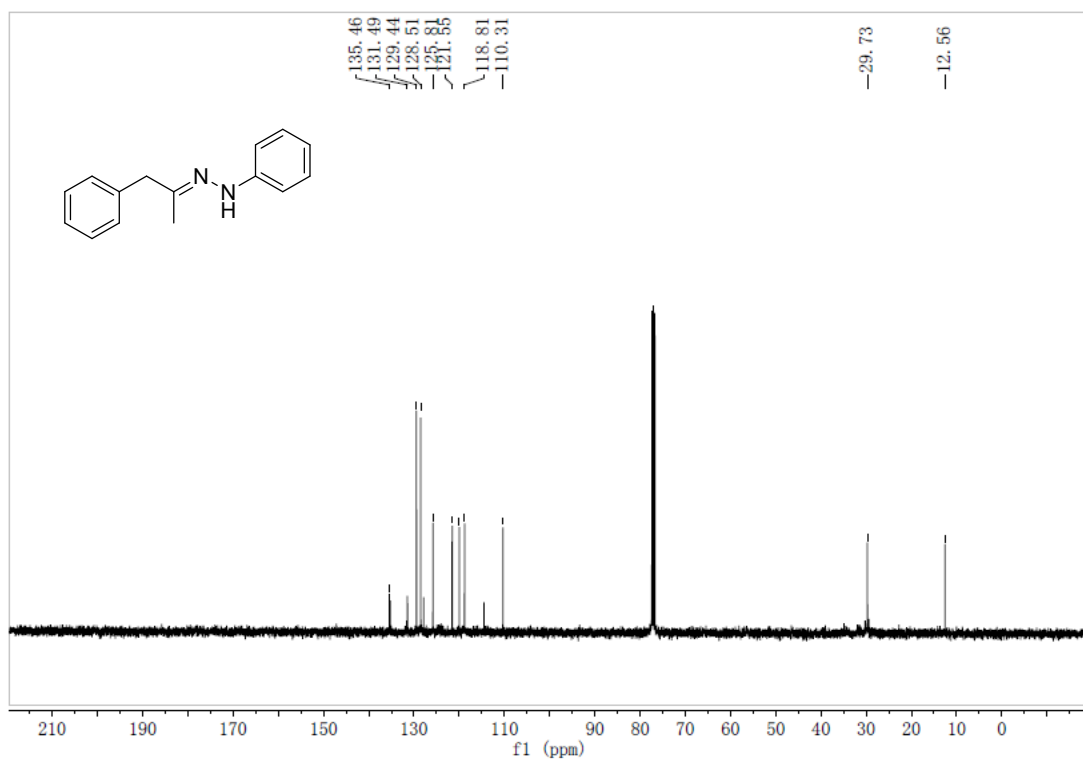



12u

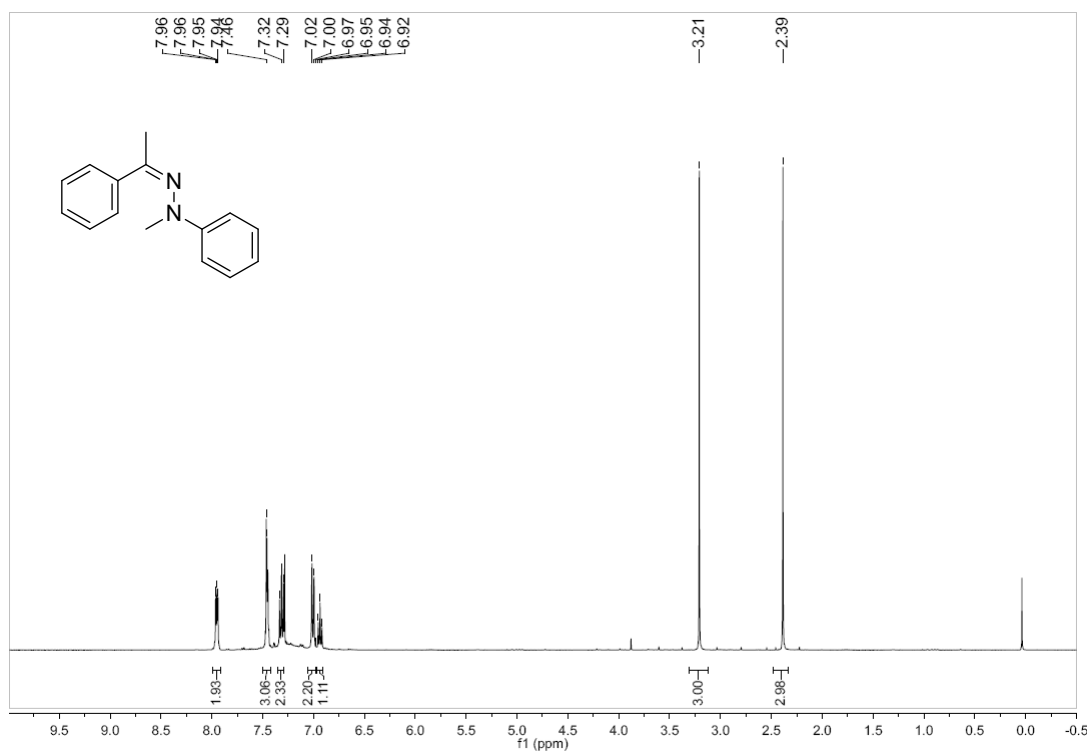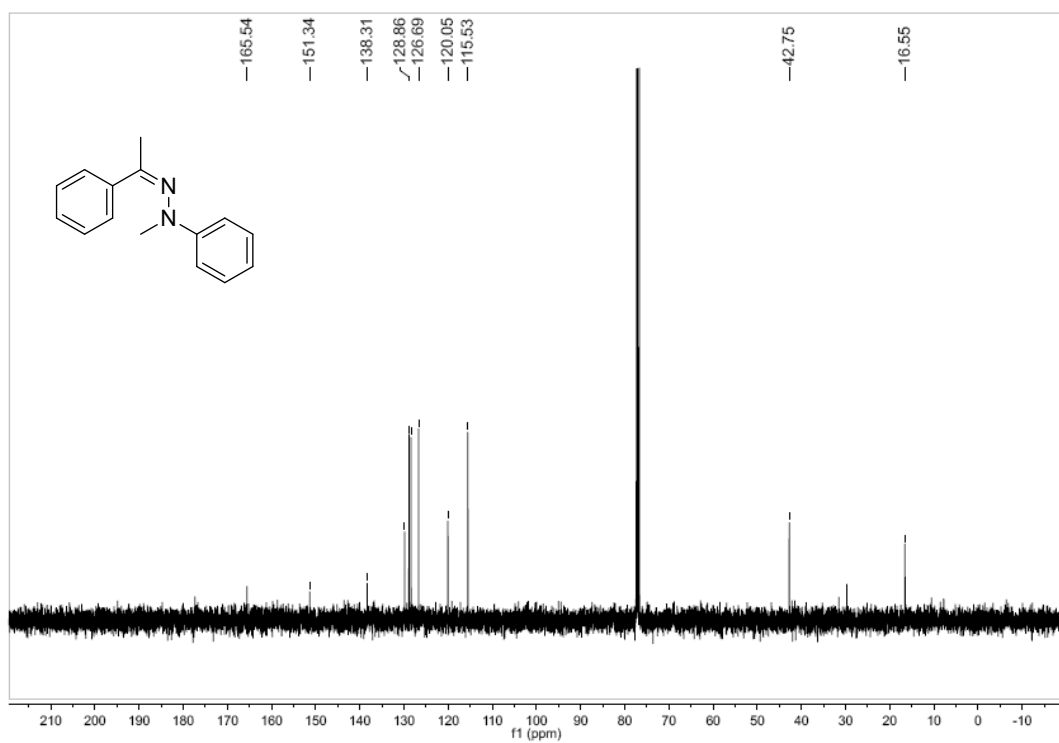

14a

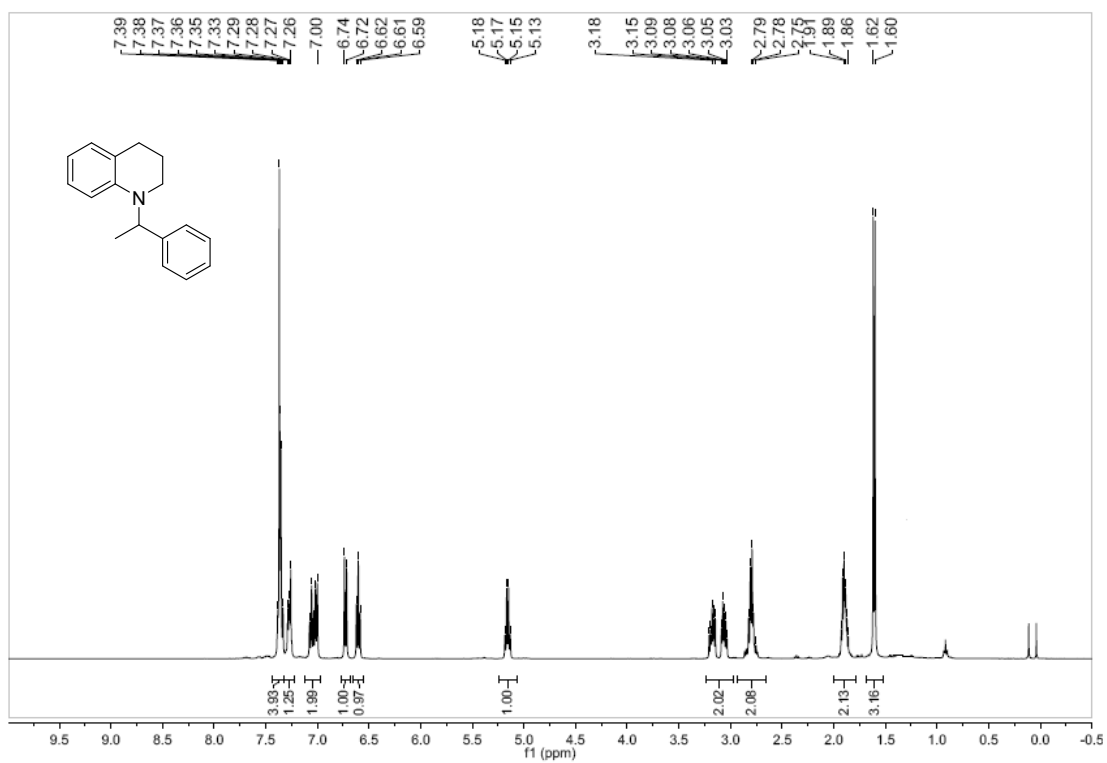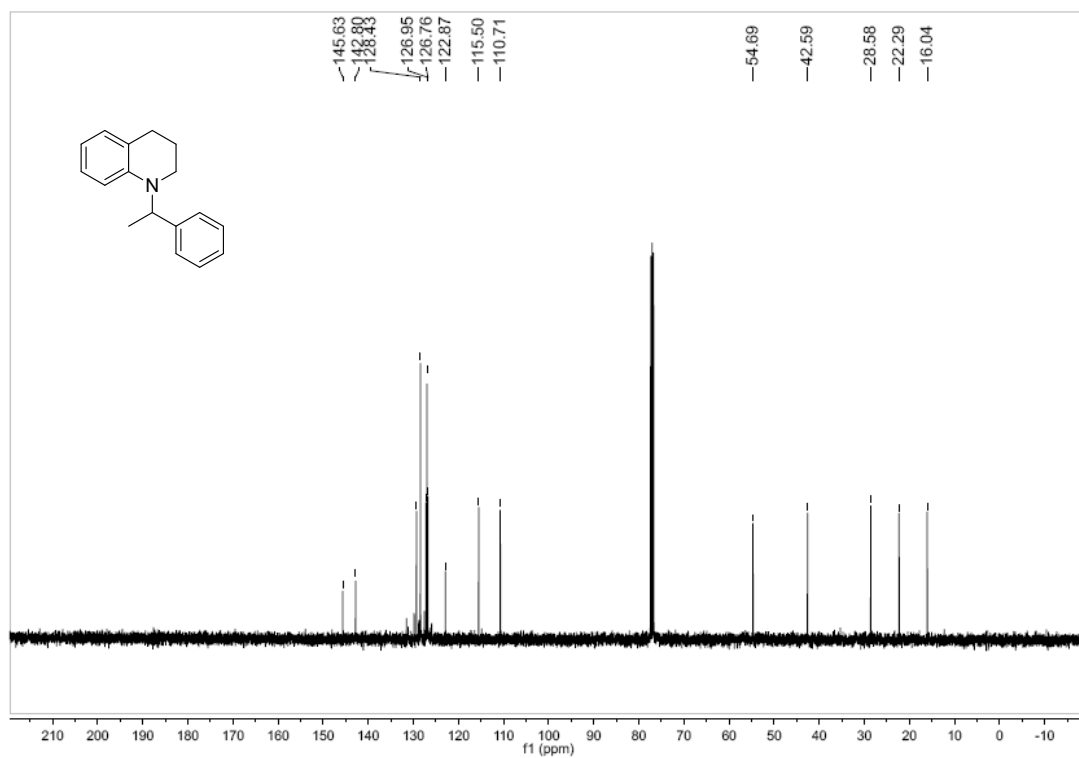

Supplement: c5dt02643a1.pdf [file c5dt02643a1.pdf]
